1 **Extreme genetic structure and dynamic range evolution in a montane**  
2 **passerine bird: implications for tropical diversification**

3  
4  
5 Carlos Daniel Cadena<sup>1\*</sup>, Jorge L. Pérez-Emán<sup>2,3</sup>, Andrés M. Cuervo<sup>4,5</sup> Laura N. Céspedes<sup>1</sup>, Kevin L. Epperly<sup>6</sup> & John  
6 T. Klicka<sup>6</sup>

7  
8 <sup>1</sup>Laboratorio de Biología Evolutiva de Vertebrados, Departamento de Ciencias Biológicas, Universidad de Los Andes,  
9 Bogotá, Colombia

10 <sup>2</sup>Instituto de Zoología y Ecología Tropical, Universidad Central de Venezuela, Caracas, Venezuela

11 <sup>3</sup>Colección Ornitológica Phelps, Caracas, Venezuela

12 <sup>4</sup>Louisiana State University Museum of Natural Science

13 <sup>5</sup>Instituto de Investigación en Recursos Biológicos Alexander von Humboldt

14 <sup>6</sup>Department of Biology and Burke Museum of Natural History and Culture, University of Washington, Seattle

15

16 <sup>\*</sup>Corresponding author. Email: ccadena@uniandes.edu.co

17 **Abstract**

18 **Aim:** Employ phylogeographic analyses of a widespread species complex to examine the role of historical and  
19 evolutionary processes in the origin and maintenance of high species diversity in the Neotropical montane region.  
20

21 **Location:** Neotropical highlands.  
22

23 **Taxon:** *Henicorhina* wood-wrens (Aves, Troglodytidae).  
24

25 **Methods:** We collected mtDNA sequence data for 288 individuals thoroughly covering the range of the *Henicorhina*  
26 *leucophrys* complex from Mexico to Bolivia. Sequences were employed to characterize population structure, infer  
27 phylogenetic relationships among populations and their divergence times, examine lineage accumulation through time,  
28 and identify presumptive species using coalescent methods. We also explored the origin of elevational and latitudinal  
29 replacements involved in spatial changes in species assemblages in the Andes.  
30

31 **Results:** We found remarkable genetic structure within the complex, which consists of numerous lineages reaching  
32 >12% sequence divergence; most divergent populations occur in areas separated by topographic barriers but several of  
33 them, typically not sister to each other, co-occur with elevational segregation on mountain slopes or replace each other  
34 with latitude along the Andes. Some close relatives occur in areas separated by thousands of kilometers, with more  
35 distant relatives occupying intervening areas. The complex likely originated in the Mexican highlands and expanded  
36 extensively in South America while diverging rapidly at a constant rate into many different lineages which have  
37 persisted for millions of years. Coalescent analyses consistently revealed that the complex may comprise more than 30  
38 species; while we do not suggest these presumptive species should be recognized by taxonomists in the absence of  
39 additional data, *H. leucophrys* is a distant outlier among New World birds in terms of high lineage diversity within a  
40 single recognized species.  
41

42 **Main Conclusions:** Our study captured wood-wren lineages in the act of building up diversity via divergence and  
43 persistence in allopatry, achievement of secondary sympatry, and coexistence at the landscape scale mediated by  
44 ecological and evolutionary divergence. Although dispersal by wood-wrens is restricted at present and this likely  
45 accounts for strong population structure across topographic barriers, their ranges have been dynamic, managing to  
46 disperse over much of the montane Neotropics. Phases of expansion and contraction of ranges and localized extinctions  
47 of populations likely account for phylogeographic patterns which are precursors to the origin of new species and the  
48 accumulation of diversity in tropical mountains.  
49

50 **Key words:** Andes, elevational replacement, range expansion, speciation  
51

## 52 Introduction

53 Mountains in the tropics contribute disproportionately to regional species richness given their area in comparison to  
54 lowlands, and are often considered global hotspots of biological diversity and endemism (Stattersfield *et al.*, 1997;  
55 Orme *et al.*, 2005; Fjelds  *et al.*, 2012). Tropical mountains exhibit particularly high beta diversity (i.e. species  
56 turnover in space) because (1) species assemblages shift along elevational gradients, and (2) related species occupy  
57 similar elevations in different mountains or in sectors of a mountain separated by geographic barriers. While  
58 knowledge of the biodiversity of mountains has advanced conceptually (Graham *et al.*, 2014; Bertuzzo *et al.*, 2016;  
59 Badgley *et al.*, 2017) and empirically (e.g., Patterson *et al.*, 1998; Jankowski *et al.*, 2009; McCain, 2009; Price *et al.*,  
60 2014; Peters *et al.*, 2016; Quintero & Jetz, 2018), accounting for species richness in montane systems remains difficult.  
61 In particular, although climate and available energy have an imprint globally on the distribution of life (Francis &  
62 Currie, 2003; Hawkins *et al.*, 2003), they cannot predict the agglomeration of range-restricted species in tropical  
63 mountains (Rahbek & Graves, 2001; Jetz & Rahbek, 2002; Rahbek *et al.*, 2007; but see Ruggiero & Hawkins, 2008).  
64 Because the high richness and uniqueness of mountains in the tropics may instead reflect high speciation rates or low  
65 extinction rates (Jetz *et al.*, 2004; Badgley *et al.*, 2017), considering evolutionary processes is crucial to a better  
66 understanding of montane diversity (Graham *et al.*, 2014; Laiolo *et al.*, 2018; Quintero & Jetz, 2018).

67 Dozens of studies have used phylogenetic and population genetic perspectives to probe into evolutionary processes  
68 underlying patterns of avian diversity in the Neotropical mountains. Birds have diversified rapidly in the Andes, with  
69 pivotal roles of features of the landscape (e.g., low-lying valleys, high-elevation passes) and of climatic changes as  
70 drivers of divergence (P rez-Em n, 2005; Weir, 2006; Cadena *et al.*, 2007; Ribas *et al.*, 2007; Sedano & Burns, 2010;  
71 Chaves *et al.*, 2011; Guti rrez-Pinto *et al.*, 2012; Valderrama *et al.*, 2014; Benham *et al.*, 2015; S nchez-Gonz lez *et*  
72 *al.*, 2015; Winger & Bates, 2015; Prieto-Torres *et al.*, 2018). Allopatric differentiation of lineages separated by barriers  
73 to dispersal is predominant (Hazzi *et al.*, 2018), whereas evidence for speciation in parapatry along mountain slopes  
74 remains elusive (Patton & Smith, 1992; Garc a-Moreno & Fjelds , 2000; Cadena *et al.*, 2012; Caro *et al.*, 2013). Thus,  
75 the replacement of closely related species along elevational gradients, a salient geographic pattern in tropical avifaunas  
76 (Terborgh, 1971, 1977), appears to result largely from populations coming into secondary contact after allopatric  
77 divergence (Diamond, 1973; Cadena, 2007; Freeman, 2015). However, with hundreds of bird species living in the  
78 Neotropical mountains, much remains to be learned about the histories of individual clades and about how such  
79 histories collectively resulted in the patterns of diversity we observe today.

80 Before conducting analyses seeking to characterize and account for patterns of diversity one must have proper  
81 knowledge of what species exist and where they occur (Fine, 2015). Traditionally, the species-level taxonomy of birds  
82 was considered well-known (Scheffers *et al.*, 2012), with suggestions that the inventory of species was essentially  
83 complete by the mid 20th century (Mayr, 1946). This, however, proved incorrect: multiple avian species have been  
84 discovered and described over recent decades, and analyses of novel data sets (notably, of vocal and genetic variation)  
85 have revealed that species-level diversity was seriously underestimated (Fjelds , 2013). The extent to which avian  
86 taxonomy will require revision depends on how one delimits species (Tobias *et al.*, 2010; Gill, 2014; Toews, 2015;  
87 Barrowclough *et al.*, 2016; Remsen, 2016), but clearly there are more species of birds than traditionally thought,  
88 particularly in the tropics. Although problems with species delimitation are unlikely to affect assessments of patterns  
89 in local (alpha) diversity of birds, inadequate knowledge of species limits may seriously influence perceptions of  
90 patterns in species turnover in space and hence regional and global patterns of diversity (beta and gamma diversity).  
91 Alternative approaches for species delimitation may also influence inferences about biogeographic history (Smith *et al.*,  
92 2018).

93 Birds in which species diversity is likely greater than traditionally thought are those in which plumages vary subtly  
94 (in which case one would expect species recognition to be based more on vocal cues), and in which ecologically  
95 relevant traits (body size, habitat, dispersal ability) may be conducive to population isolation (Burney & Brumfield,  
96 2009; Salisbury *et al.*, 2012; Smith *et al.*, 2014; Harvey *et al.*, 2017a). Here, we analyze the phylogeography of the  
97 Grey-breasted Wood-wren complex (*Henicorhina leucophrys*, Troglodytidae), a group of small, drably colored and  
98 highly vocal songbirds of forest interior, with poor dispersal abilities. Because the complex is broadly distributed from

99 Mexico to Bolivia and restricted to montane forest habitats, it is an appropriate system in which to ask questions  
100 relevant to understanding the role of evolutionary processes in establishing patterns of diversity in Neotropical  
101 mountains. We used extensive geographic sampling to reconstruct the phylogenetic relationships of populations in the  
102 complex and to characterize patterns of genetic variation with the goals of (1) gaining insight about the tempo and  
103 mode of evolutionary differentiation and on the role of colonization of new regions in diversification, (2) understanding  
104 the role of geographic isolation in the differentiation of lineages, and (3) exploring the origin of elevational  
105 replacements leading to changes in species assemblages with elevation. We also examined the extent to which current  
106 taxonomy adequately reflects true diversity and reflected on the influence of cryptic differentiation for inferences about  
107 diversification processes and patterns of diversity in the tropics.

## 108 **Methods**

### 109 **Study system**

110 *Henicorhina* wrens (Troglodytidae) range widely in the Neotropical region. Traditionally, taxonomists recognized two  
111 widespread species, the White-breasted Wood-Wren (*H. leucosticta*) and the Grey-breasted Wood-Wren (*H.*  
112 *leucophrys*). Two species with restricted ranges, Bar-winged Wood-Wren (*H. leucoptera*) from southern Ecuador and  
113 northern Peru (Fitzpatrick *et al.*, 1977), and Munchique Wood-Wren (*H. negreti*) from western Colombia (Salaman *et*  
114 *al.*, 2003), were later described. More recently, another narrow endemic formerly considered a subspecies of *H.*  
115 *leucophrys*, Hermit Wood-Wren (*H. anachoreta*) from northern Colombia, was elevated to species status (Cadena *et*  
116 *al.*, 2016). Preliminary data on phylogenetics and population structure of wood-wrens based on mitochondrial DNA  
117 sequences suggest that both *H. leucosticta* and *H. leucophrys* are paraphyletic (*H. leucoptera* is nested within *H.*  
118 *leucosticta* and *H. anachoreta* is nested within *H. leucophrys*), and both comprise multiple distinct lineages (Dingle *et*  
119 *al.*, 2006; Becker *et al.*, 2007; Caro *et al.*, 2013; Aguilar *et al.*, 2014; Smith *et al.*, 2014). However, no comprehensive  
120 analysis of genetic variation across the range of either widespread species has been conducted.

121 Wood-wrens segregate ecologically by elevation. Overall, *H. leucosticta* is a lowland species replaced in montane areas  
122 by *H. leucophrys*; their replacement is sharp and likely mediated by interspecific competition (Jankowski *et al.*, 2010).  
123 In the isolated Cordillera del C6ndor of southern Ecuador and northern Peru, *H. leucophrys* also replaces *H.*  
124 *leucosticta* in montane areas but is absent from higher elevations where *H. leucoptera* occurs (i.e. the three species  
125 turn over along the elevation gradient; Fitzpatrick *et al.*, 1977; Dingle *et al.*, 2006). Likewise, in part of the western  
126 slope of the Colombian Andes, *H. negreti* replaces *H. leucophrys* (subspecies *brunneiceps*) at higher elevations, and is  
127 in turn replaced by nominate *H. leucophrys* east of the ridgeline on the eastern slope of the cordillera (Salaman *et al.*,  
128 2003). In addition, two populations of *H. leucophrys* differing in mtDNA sequences, morphology, and songs are  
129 parapatrically distributed along an elevational gradient in Ecuador (Dingle *et al.*, 2008; Dingle *et al.*, 2010), but  
130 nuclear gene flow indicates they are conspecific (Halfwerk *et al.*, 2016). A similar scenario with populations differing  
131 genetically, morphologically and vocally, and turning over along an elevational gradient exists in the Sierra Nevada de  
132 Santa Marta, northern Colombia (Caro *et al.*, 2013; Burbidge *et al.*, 2015); because there is little to no hybridization,  
133 these populations are now treated as separate species, with *H. anachoreta* sharply replacing *H. leucophrys* at higher  
134 elevations (Cadena *et al.*, 2016).

### 135 **Sampling**

136 We focused on the *H. leucophrys* complex, i.e. the clade defined by the most recent common ancestor of populations  
137 referable to *H. leucophrys* in current taxonomy and *H. anachoreta* (Dingle *et al.*, 2006; Caro *et al.*, 2013). Although *H.*  
138 *negreti* was not sampled in previous molecular analyses, we consider it part of the complex based on phenotypic traits  
139 (Salaman *et al.*, 2003) and our data (see below). The *H. leucophrys* complex is widespread in Neotropical mountains,  
140 ranging from Mexico to Bolivia (Figure 1); as currently circumscribed, it consists of 19 taxa including *H. anachoreta*,  
141 *H. negreti*, and 17 subspecies of *H. leucophrys* (Kroodsmas & Brewer, 2005). For phylogeographic analyses, we sought  
142 to sample as thoroughly as possible across geography and taxonomy. Combining sequences generated for this study  
143 and published sequences available in GenBank (total 288 individuals), we managed to cover nearly all of the  
144 distribution range of the complex and all named taxa, with multiple individuals and localities per taxon whenever

145 possible (Figure 1; Supplementary Table 1). Sampling in Middle America covered all the major montane areas where  
146 members of the complex occur; within South America sampling was especially thorough in Venezuela, Colombia and  
147 Ecuador, and less so in the southern part of the range (i.e. Peru and Bolivia). As outgroups for phylogenetic analyses,  
148 we used specimens of *H. leucosticta* and *H. leucoptera*, and of species of *Microcerculus*, *Campylorhynchus*,  
149 *Cistothorus*, *Troglodytes*, *Cantorchilus* and *Cyphorhinus* (see Barker, 2017 for an overview of relationships among  
150 wren genera), for a grand total of 300 individuals considered in analyses.

## 151 DNA extraction and sequencing

152 We extracted DNA using DNeasy tissue extraction kits (Qiagen, Valencia, CA) following the manufacturer's protocol.  
153 We then amplified an 842 base-pair region of the mtDNA gene ATPase 6/8 using primers described by Joseph et al.  
154 (2004). We chose to sequence this region because it has been employed in earlier studies of *Henicorhina* (Dingle et al.,  
155 2006; Dingle et al., 2008; Caro et al., 2013), which enabled us to include published sequences in analyses. Fragments  
156 were amplified via polymerase chain reaction (PCR) in 12.5 µl reactions with denaturation at 94 °C for 10 min, 40  
157 cycles of 94 °C for 30 s, 54 °C for 45 s, and 72 °C for 2 min, followed by 10 min elongation at 72 °C and 4 °C soak.  
158 PCR products were sequenced at the Barrick Museum of Natural History (University of Nevada, Las Vegas),  
159 Universidad de los Andes (Bogotá, Colombia), or the High-Throughput Genomics Unit at the University of  
160 Washington. Chromatograms were aligned using Sequencher v4.9 (GeneCodes Corporation, Ann Arbor, MI).

## 161 Analyses

### 162 Gene trees

163 Before phylogenetic analyses, we determined the best-fit model of evolution to be GTR + G with jModeltest v2. 1. 7  
164 (Posada, 2008). We then used Bayesian (BEAST v1.8.4; Drummond et al., 2012) and maximum-likelihood (RAxML v  
165 8.2.4; Stamatakis, 2006) methods to estimate phylogenetic trees. For the Bayesian analyses we ran 50 million  
166 generations, sampling trees and parameters every 5000 generations. A relaxed uncorrelated lognormal clock with a rate  
167 of 2% and a birth-death speciation tree prior (Ritchie et al., 2017) were applied. We confirmed likelihood stationarity  
168 and adequate effective sample sizes above 200 for all estimated parameters using Tracer v1.6.0  
169 (<http://tree.bio.ed.ac.uk/software/tracer>). The parameter values of the samples from the posterior distribution on the  
170 maximum clade credibility tree were summarized after discarding the first 5 million generations (10%) as burn-in  
171 using TreeAnnotator v1.8.4 (Drummond et al., 2012). Maximum-likelihood analyses were conducted using a  
172 GTRGAMMA model and run for 1000 nonparametric rapid bootstrap replicates to provide an assessment of nodal  
173 support.

174 Both Bayesian and maximum-likelihood analyses were first done with a dataset containing all ATPase sequences (n =  
175 300), then repeated with a reduced data set containing only individuals having unique haplotypes (n = 184), and then  
176 reduced further by removing all non-*Henicorhina* taxa (i.e. outgroups). Trees constructed using the latter data set (n  
177 = 178) were set aside for use in species delimitation analyses described below. To visualize and annotate trees and to  
178 produce figures, we employed R packages ggtree (Guangchuang et al., 2017) and phytools (Revell, 2012), and QGIS v  
179 2.18.20 with the Qgis2threejs plugin (<http://qgis.osgeo.org>).

### 180 Species delimitation

181 Given uncertainty about species diversity in the *H. leucophrys* complex, we employed two coalescent approaches using  
182 mtDNA data to identify distinct lineages which may be considered presumptive species worthy of additional study  
183 with other sources of information (Carstens et al., 2013; Sukumaran & Knowles, 2017): (1) multi-rate Poisson Tree  
184 Processes (mPTP v0.2.0; Kapli et al., 2017) and (2) a Bayesian implementation of the General Mixed Yule Coalescent  
185 Model (bGMYC v1.0.2; Reid & Carstens, 2012). The trees generated by BEAST using the unique haplotype dataset  
186 were used as input for these analyses.

187 For the mPTP analysis we ran five replicate mcmc chains of 10,000,000 generations, sampling every 10,000 with a  
188 burn-in of 1,000,000 (10%) using the maximum clade credibility tree obtained as described above. Minimum branch  
189 length was calculated using the `minbr_auto` function prior to the analysis. We ran bGMYC with 100 of the 10,000  
190 gene trees estimated in the BEAST analysis, after removing 10% as burn-in; this approach accounts for error in gene-  
191 tree estimation by integrating over uncertainty in tree topology and branch lengths. For each tree we ran an MCMC  
192 chain of 50,000 steps with 40,000 steps of burn-in and a thinning interval of 100 steps. We focused our results and  
193 discussion on lineages (i.e. presumptive species) defined using a threshold of 0.5 on probability of membership of  
194 individuals (Gehara *et al.*, 2017). However, we also considered more conservative approaches where presumptive  
195 species were identified as clusters in the gene tree with posterior probabilities of belonging to the same species  $\geq 0.90$   
196 or  $\geq 0.95$ , which allowed us to compare our results to similar work on other birds (Smith *et al.*, 2014; Harvey *et al.*,  
197 2017b; Smith *et al.*, 2017).

## 198 *Diversification through time*

199 To describe patterns of lineage accumulation over time, we constructed lineage-through-time (LTT) plots and  
200 estimated the gamma statistic (Pybus *et al.*, 2000). We accounted for phylogenetic uncertainty by performing these  
201 analyses on a sample of credible trees in the posterior distribution obtained from the BEAST analysis. We employed  
202 the 100 trees constructed using only unique haplotypes as input for the bGMYC analyses and trimmed them to  
203 include 39 tips corresponding to the presumptive species recognized under the 0.5 threshold. Then we used functions  
204 implemented in R packages `ape` (Paradis *et al.*, 2004) and `paleotree` (Bapst, 2012) to build an LTT plot with a 95%  
205 confidence interval and to calculate the gamma statistic for each tree. We also examined diversification dynamics  
206 employing Bayesian Analysis of Macroevolutionary Mixtures (program BAMM v 2.5.0; Rabosky *et al.*, 2013). Because  
207 results were qualitatively similar between methods, we report only those obtained using the simpler approach  
208 implemented in `ape`.

## 209 **Results**

210 We found substantial genetic differentiation among populations in the *H. leucophrys* complex. In total, we recovered  
211 172 haplotypes among the 288 individuals analyzed. Several haplotypes were highly divergent from each other, with  
212 uncorrected genetic distances between them reaching  $>12\%$  (i.e. between individuals from Sierra Madre del Sur of  
213 Mexico and from the east slope of the Cordillera Occidental of Colombia). Genetic variation was highly structured  
214 spatially, but was not readily accounted for by geographic distance among populations. We did not conduct formal  
215 analyses of isolation by distance, but genetic distances among isolated populations from adjacent mountains were often  
216 much greater than genetic distances observed over larger distances in more continuous ranges. For instance, mean  
217 genetic distances among the five montane areas of Venezuela that we sampled was 7.3% (range 6.1%-8.3%), whereas  
218 genetic distances within montane regions extending over comparable distances were much lower, e.g. reaching only  
219 3.5% in the Sierra Madre Oriental of Mexico or 1.7% in the Talamanca-Chiriquí mountains of Costa Rica and  
220 Panama.

221 Maximum-likelihood and Bayesian phylogenetic analyses recovered similar overall patterns (Figure 2., Supplementary  
222 Figures 1-2). The deepest split in gene trees separates clades corresponding to Mexican populations from the Sierra  
223 Madre del Sur and the western reaches of the Trans-Mexican Volcanic Belt from a large and strongly supported clade  
224 including the remainder of populations in the complex. Within the latter clade, the earliest diverging group occurs in  
225 eastern Mexico and consists of three subclades, each corresponding to a unique region within the Sierra Madre  
226 Oriental. Sister to this group is a clade divided in two main groups (albeit without strong support, i.e. 0.88 posterior  
227 probability, 68% ML bootstrap in analyses using only unique haplotypes): one includes samples from lower Central  
228 America (Costa Rica and Panama, subspecies *collina*), whereas the other includes all South American populations of  
229 *H. leucophrys*, the Colombian endemic species *H. anachoreta* and *H. negreti*, and a clade formed by samples of *H.*  
230 *leucophrys* from Chiapas (Mexico), Guatemala, and El Salvador (subspecies *castanea* and *composita*). The latter clade,  
231 of somewhat uncertain affinities within an otherwise South American group (it was recovered as sister to *H. negreti*  
232 with 0.95 posterior probability and 56% ML bootstrap in analyses using only unique haplotypes), is the only exception  
233 to the pattern in which Mexican and Central American populations are the earliest diverging lineages in the complex.

234 Basal relationships among major South American lineages were unresolved or poorly supported, yet some patterns in  
235 the region are noteworthy. Whereas populations from some isolated montane systems (e.g. the Serranía de Perijá, or  
236 the Venezuelan Cordillera de la Costa and Sierra de San Luis) formed distinct clades, this was not the case for the  
237 main cordilleras of the northern Andes, resulting in complicated patterns of area relationships. For example, several  
238 populations from the western slope of the Andes from Colombia through Ecuador and into northwestern Peru formed  
239 a large clade (clade i. in Figure 2), but this clade was not exclusive because it also included some -but not all-  
240 populations from the northern sector of the Cordillera Central of Colombia and did not cluster all populations from  
241 the western Andes: *H. negreti* and lineages of *H. leucophrys* from the northern and southern sectors of the Cordillera  
242 Occidental of Colombia and from western Ecuador occupied different positions in the tree. Likewise, birds from the  
243 Cordillera Oriental of the Colombian Andes formed multiple distinct clades seemingly distantly related to each other,  
244 and populations from the Central and Southern Andes (i.e. from Bolivia and Peru south of the Marañón Valley or  
245 North Peru Low) formed at least two highly divergent clades with differing affinities. Given weak support for deep  
246 branches in South America we do not elaborate further on relationships among major biogeographic areas, but do  
247 emphasize the complexity of phylogeographic pattern and the strong genetic structure existing over relatively fine  
248 spatial scales throughout the continent.

249 Part of the complexity in phylogeographic pattern related to occurrence of phylogenetically distant groups in the same  
250 regions can be understood by examining elevational distributions: lineages known to replace each other along  
251 elevational gradients in northern South America are not sister to each other (Figure 3). This was true of taxa  
252 occurring in the Ecuadorean Andes (*H. l. hilaris* and nominate *H. l. leucophrys*), the Santa Marta mountains (*H. l.*  
253 *bangsi* and *H. anachoreta*), and in the western slope of the Colombian Andes (*H. l. brunneiceps* and *H. negreti*). Our  
254 data further revealed a previously unknown case of cryptic replacement of mtDNA lineages along an elevational  
255 gradient in the Venezuelan Andes. The lineage occurring in the Tamá massif near the Colombia-Venezuela border  
256 crosses the Táchira depression to the northeast into the Cordillera de Mérida where we found it from c. 1520 m to c.  
257 1920 m. Only a small distance upslope in this range, a different lineage occupied elevations from c. 2100 m to c. 2750  
258 m. Divergence in mtDNA sequences between lineages replacing each other with elevation was substantial, in all cases  
259 exceeding 5% uncorrected *p* distances (Figure 3).

260 In addition to examples of elevational parapatry, our analyses revealed cases where lineages may meet in contact zones  
261 along a latitudinal axis. For instance, two lineages differing in c. 7% uncorrected *p*-distance replace each other along  
262 the northern sector of the Cordillera Central of the Colombian Andes. One of these lineages occurs in the northern tip  
263 of the cordillera in Antioquia, whereas the other is also found in Antioquia, where we suspect it might range north to  
264 the southern extreme of the Aburrá Valley in the outskirts of the city of Medellín. Individuals occupying the northern  
265 extreme of the Cordillera Central are most closely allied to geographically distant populations from the western slope  
266 of the Andes (i.e. subspecies *hilaris* and *brunneiceps*), which tend to occur at lower elevations and are replaced upslope  
267 by nominate *H. leucophrys* in Ecuador or *H. negreti* in southwest Colombia. Several other examples of distinct  
268 lineages occurring at different latitudes within mountain systems exist in the Cordillera Oriental of Colombia and  
269 along the Andes of Ecuador (Figure 2).

270 Coalescent approaches to delimit species produced consistent results: both mPTP and bGMYC (the latter with a 0.50  
271 probability threshold to define group membership) recovered *H. anachoreta* and *H. negreti* as distinct species, and  
272 both methods identified 37 additional lineages in the *H. leucophrys* complex which may prove to be distinct species  
273 (Figure 2, Supplementary Figure 3). Although methods did not exactly agree in how they assigned individuals to  
274 presumptive species, congruence was remarkable. The only differences were that in the Cordillera de Mérida,  
275 Venezuela, mPTP recognized three presumptive species while bGMYC recognized two, and that in a clade from  
276 northern Peru and southeast Ecuador mPTP recognized a single presumptive species and bGMYC recognized two  
277 (Figure 2). Applying more stringent probability thresholds to delimit species in bGMYC analyses resulted in the  
278 inference of slightly lower numbers of presumptive species: 36 and 35 with 0.90 and 0.95 thresholds, respectively. In  
279 general, presumptive species appear to have restricted ranges (Figure 4, Supplementary Figure 4); in some cases,  
280 particular mountain systems harbor a single presumptive species (e.g. Sierra Madre del Sur and Trans-Mexican  
281 Volcanic Belt in Mexico, Cordillera de la Costa and Sierra de San Luis in Venezuela), but more than one presumptive  
282 species may also occur within a region (e.g. Sierra Madre Oriental of Mexico, Sierra Nevada de Santa Marta in

283 Colombia) and a few of them have ranges encompassing various montane areas (e.g. across cordilleras of Costa Rica  
284 and Panama). The diversity of presumptive species is especially remarkable in northern South America, with 7-8  
285 identified in Venezuela, 15 in Colombia, and 7-8 in Ecuador. Because our sampling was sparser in Peru and Bolivia,  
286 our figures for these countries are likely underestimates of presumptive species richness.

287 Our estimates of divergence times obtained from the BEAST analysis of unique haplotypes indicate that the *H.*  
288 *leucophrys* complex diverged from its sister group (i.e. the clade formed by *H. leucosticta* and *H. leucoptera*)  
289 approximately 16.8 million years before present (13.0-20.5 95% highest posterior density, HPD), with the crown age of  
290 extant populations dating to 10.6 m.a. (8.4-13.1 95% HPD). Over this period, the complex has diversified into  
291 multiple lineages; we found it minimally consists of 10 lineages of at least 5 million years of age and of 26 lineages of  
292 at least 2 million years of age (Figure 2, Supplementary Figure 3). The estimated age of the node including all South  
293 American populations as well populations from Chiapas, Guatemala, and El Salvador is 6.2 m.a. (5.2-7.3 95% HPD),  
294 whereas that of the node including all South American populations excluding *H. negreti* is 5.8 m.a. (4.9-6.7 95%  
295 HPD).

296 Analyses of lineage accumulation over time based on presumptive species identified by bGMYP suggested that rates of  
297 diversification in the *H. leucophrys* complex may have declined over time, with a significantly negative gamma  
298 statistic (Figure 5). However, through much of the history of the complex, diversification appears to have been nearly  
299 constant and exponential, with an apparent downturn in the last million years most likely reflecting that our species  
300 delimitation analyses recognized no species younger than this age.

## 301 Discussion

### 302 *Phylogeography: bridges, barriers and the distribution of genetic variation.*

303 As evidenced by the branching pattern in the gene tree with deep splits involving populations from the north, the *H.*  
304 *leucophrys* complex likely originated in the Mexican highlands ca. 8 to 13 m.a., from where it expanded south through  
305 Central America, then colonizing South America. Other birds ranging broadly in montane forests also originated in  
306 the northern Neotropics, including single species as well as clades which diversified in Central and South America  
307 (Pérez-Emán, 2005; Cadena *et al.*, 2007; Weir *et al.*, 2008; Sánchez-González *et al.*, 2015). Molecular-based estimates  
308 of when did birds colonize South America from the north vary (Bacon *et al.*, 2015; Barker *et al.*, 2015); our results  
309 indicate colonization by the *H. leucophrys* complex occurred slightly earlier (ca. 7 to 5 m.a.) than a pulse of avian  
310 interchange via the Isthmus of Panama 4 to 2 m.a. (Smith & Klicka, 2010). Our estimates of the age of the *H.*  
311 *leucophrys* complex and of the timing of events like its colonization of South America are old relative to what one  
312 would expect given published estimates of divergence times among wren genera (Barker, 2017). However, such  
313 estimates were derived assuming that *Certhia* and *Troglodytes* diverged ca. 16 m.a. (Moyle *et al.*, 2016), while  
314 analyses integrating more extensive fossil evidence suggest such divergence occurred much earlier, ca. 27 m.a.  
315 (Claramunt & Cracraft, 2015). The time frame for wren diversification implied by the latter analysis is more  
316 congruent with our estimated ages for nodes in *Henicorhina* and with previous work in other wren genera based on  
317 mtDNA data (Barker, 2007).

318 Poorly supported relationships among South American clades associated with short internodes subtending long  
319 branches are common to *H. leucophrys* and other birds colonizing South America from the north (e.g., Pérez-Emán,  
320 2005; Cadena *et al.*, 2007). This indicates range expansions and ensuing rapid diversification of lineages in geographic  
321 isolation, a pattern also documented in montane clades with South American (Chaves *et al.*, 2011) or uncertain  
322 geographic origins (Gutiérrez-Pinto *et al.*, 2012). Rapid range expansions occurring in concert across birds may  
323 indicate that geological changes like closure of the Isthmus of Panama and uplift of mountains increased connectivity  
324 among formerly isolated regions, enabling subsequent diversification of various taxa over the vast South American  
325 landscape; climatic changes driving population isolation likely facilitated such diversification (Barrantes, 2009;  
326 Ramírez-Barahona & Eguiarte, 2013).



327 Genetic divergence associated with landscape features isolating montane habitats is another pattern shared by the *H.*  
328 *leucophrys* complex and co-distributed clades (Weir, 2009). Such features include lowland areas in Central America  
329 (Cadena *et al.*, 2007; Barber & Klicka, 2010), inter-Andean valleys like the Magdalena and Marañón (Gutiérrez-Pinto  
330 *et al.*, 2012; Benham *et al.*, 2015), and alpine areas separating slopes of cordilleras (Parra *et al.*, 2009; Valderrama *et*  
331 *al.*, 2014). For many Neotropical montane birds that have been studied, genetic structure across geographic barriers  
332 coincides with plumage differences (Cadena *et al.*, 2011; Winger & Bates, 2015; Winger, 2017). Phenotypic differences  
333 among distinct lineages of *H. leucophrys*, however, are either subtle or appear to be nonexistent (Kroodsma & Brewer,  
334 2005). Reduced gene flow across barriers may have influenced vocal differentiation of wood-wrens more strongly, but  
335 given their complex songs, confirming it awaits studies documenting repertoires of individuals as well as variation  
336 within and among populations. Such data are relevant given uncertainty about species limits in the complex (see  
337 below) because vocalizations likely play a critical role in species recognition (Caro *et al.*, 2013; but see Halfwerk *et al.*,  
338 2016).

339 In sum, our study and other phylogeographic analyses point to geological and climatic dynamics of the montane  
340 Neotropics as drivers of avian speciation both by (1) promoting dispersal across formerly isolated areas and (2)  
341 spurring diversification linked to the origin of new habitats resulting from uplift processes and vicariance.  
342 Furthermore, because wood-wrens live in rugged landscapes and disperse little, their populations may become isolated  
343 and diverge even without marked geological or climatic changes (Smith *et al.*, 2014). Beyond patterns common to the  
344 *H. leucophrys* complex and other tropical montane birds, two aspects appear unique to our study system. First, the  
345 degree of genetic structure within a single recognized species we uncovered far exceeds that observed in other montane  
346 birds. Second, our finding that distinct mtDNA lineages which likely diverged in allopatry have come into contact in  
347 various regions and some coexist segregated by elevation is novel. Because the extreme genetic structure we uncovered  
348 may imply that *H. leucophrys* comprises more species than traditionally thought and because secondary sympatry of  
349 divergent populations is crucial to the buildup of species richness, these results have implications for understanding  
350 tropical diversity and the historical and evolutionary processes generating and sustaining it.

### 351 ***Extreme population structure, cryptic divergence, and patterns in tropical diversity***

352 We uncovered genetic structure in the *H. leucophrys* complex across well-known geographic barriers (Hazzi *et al.*,  
353 2018), but also over fine scales in ways not associated with divergence in other tropical montane birds. For example,  
354 in the Cordillera Occidental and Cordillera Central of Colombia, where other birds show little to no population  
355 structure (Cadena *et al.*, 2007; Gutiérrez-Pinto *et al.*, 2012; Isler *et al.*, 2012; Valderrama *et al.*, 2014), we found six  
356 mtDNA lineages of at least 1 million years of age. These lineages and others have restricted ranges, and some of their  
357 boundaries reflect topographic or climatic breaks (Graham *et al.*, 2010; Supplementary Figure 4). Traits affecting  
358 dispersal abilities and dependence on closed understory habitats mediate divergence across putative barriers and thus  
359 diversification in topographically complex landscapes (Burney & Brumfield, 2009; Smith *et al.*, 2014). Because wood-  
360 wrens are small-bodied, have small and rounded wings and live in dark forest understory, they likely disperse little  
361 (Moore *et al.*, 2008), and this may account in part for their exceptionally strong population structure (Claramunt *et*  
362 *al.*, 2012; Salisbury *et al.*, 2012; but see Smith *et al.*, 2017). Deep phylogeographic structure also exists in other small-  
363 bodied wrens (i.e. other *Henicorhina*, *Cistothorus*, *Troglodytes*; Dingle *et al.*, 2006; Campagna *et al.*, 2012; Galen &  
364 Witt, 2014; Robbins & Nyári, 2014), suggesting that their biology predisposes populations to become isolated and  
365 diverge.

366 Regardless of the ultimate causes of population structure, we discovered heretofore underappreciated diversity within a  
367 taxon traditionally treated as a single species. Although our study employed only one molecular marker, some of the  
368 lineages we recovered coexist as distinct phenotypic entities exhibiting behavioral barriers to hybridization (Salaman  
369 *et al.*, 2003; Caro *et al.*, 2013; Burbidge *et al.*, 2015), implying that several species are involved. Genetic distances  
370 (i.e., divergence times) are not appropriate surrogates for reproductive isolation (Roux *et al.*, 2016), but we note that  
371 wood-wren lineages demonstrating barriers to gene flow in sympatry (i.e. *anachoreta* and *l. bangsi*; *negreti* and *l.*  
372 *brunneiceps*; *negreti* and nominate *leucophrys*) last shared ancestors more recently than many other lineages in the  
373 complex. It is also remarkable that the phylogeography of *H. leucophrys* resembles that of *Atlapetes* brushfinches  
374 (Emberizidae), which also have a northern origin and montane distribution through the Neotropics, and which have

375 diverged into numerous lineages upon colonizing South America (Sánchez-González *et al.*, 2015; J. L. Pérez-Emán,  
376 unpubl. data). In contrast to *H. leucophrys*, *Atlapetes* diversified extensively in plumage and this has arguably  
377 influenced taxonomy, with researchers recognizing 28 species in the group (Remsen *et al.*, 2018). Just as lineages of  
378 the *H. leucophrys* complex replace each other in space, species of *Atlapetes* are for the most part allopatric or replace  
379 each other sharply along elevational or latitudinal axes in the Andes (Remsen & Graves, 1995), with their ranges often  
380 matching those of lineages of *H. leucophrys* uncovered by our study. This comparison serves to illustrate what might  
381 be a more general situation in which clades with roughly similar ages and genetic structure (South American *Atlapetes*  
382 are actually younger than South American *H. leucophrys*) may be split to different degrees by taxonomists because of  
383 differences among clades in the traits birds employ for signaling and in the lability of such traits. In other words, birds  
384 like wood-wrens may be under split owing to their conserved plumage and because the role of vocalizations in species  
385 recognition remains understudied (see also D'Horta *et al.*, 2013).

386 Our coalescent analyses indeed suggest that taxonomy underestimates species diversity in the *H. leucophrys* complex:  
387 we consistently identified 39 presumptive species across methods. Even the 35 presumptive species identified by  
388 bGMYC using a more conservative probability threshold of 0.95 represents a quite remarkable figure relative to  
389 similar studies conducted in the Neotropics. In 27 clades of lowland birds ranging from Central America across the  
390 Andes through much of Amazonia and even into the Atlantic Forest (Smith *et al.*, 2014), the mean number of species  
391 identified using bGMYC also with a 0.95 threshold was 5.3 (range 1-18); figures were slightly higher in understory  
392 birds (11 clades; mean = 6.6, range 3-11 presumptive species) but still much lower than our estimates for the *H.*  
393 *leucophrys* complex. Moreover, in 173 taxonomic species of birds from the New World subject to phylogeographic  
394 analyses employing mtDNA data, the largest number of presumptive species identified by bGMYC with a 0.90  
395 threshold was 23 (Harvey *et al.*, 2017b; Smith *et al.*, 2017), highlighting the *H. leucophrys* complex as a distinct  
396 outlier (Figure 6). This is despite our sparse sampling in the Peruvian and Bolivian Andes, where one would expect  
397 more lineages exist. We do not argue that all lineages we uncovered are species given existing evidence, but several are  
398 candidates for studies examining other molecular markers, morphology, voices, and behavior (Caro *et al.*, 2013;  
399 Burbidge *et al.*, 2015; Halfwerk *et al.*, 2016). The allopatric ranges of most wood-wren lineages preclude tests of  
400 intrinsic barriers to gene flow, but given postzygotic isolation in other phenotypically cryptic, old lineages of  
401 Neotropical birds (Pulido-Santacruz *et al.*, 2018), some of them may well be reproductively isolated.

402 Even if hypothetical species our analyses flagged represent distinct lineages not yet reaching the status of “biological”  
403 species (Carstens *et al.*, 2013; Sukumaran & Knowles, 2017), our work allows for conclusions about cryptic diversity  
404 which should be robust to analyses involving other data. First, regardless of the species concept one follows and of the  
405 criteria one uses to recognize species, there are more wood-wren species than traditionally thought. Second, the *H.*  
406 *leucophrys* complex comprises multiple independently evolving populations which have diverged to different degrees  
407 along the speciation continuum; if one embraces the generalized lineage concept, which views species as segments of  
408 metapopulation lineages and considers all other species “concepts” as contingent –albeit not necessary– properties of  
409 species one may use as criteria to recognize them (de Queiroz, 1998, 2007), then the complex is arguably a collection  
410 of several kinds of species, all of which represent fundamental evolutionary units. Finally, even if one takes a  
411 conservative standpoint and treats most of the lineages we uncovered as distinct populations of a single or a few  
412 species (Sukumaran & Knowles, 2017), the *H. leucophrys* complex has clearly differentiated into numerous lineages  
413 (especially following its colonization of South America) and such lineages have persisted over long periods.

414 Because most wood-wren lineages are not sympatric (see below), our finding that the *H. leucophrys* complex probably  
415 comprises multiple species has no influence on local estimates of diversity. However, species richness and endemism at  
416 regional scales might need to be revised. For example, current taxonomy recognizes only one species (and only five  
417 subspecies) in the complex in Venezuela (Kroodsma & Brewer, 2005), yet we uncovered 7-8 presumptive species –each  
418 endemic to a particular montane system– in the country. If lineages identified as presumptive species are elevated to  
419 species status and similar patterns exist in other taxa not yet studied, then geographic variation in population  
420 structure may alter knowledge of spatial patterns of diversity (e.g., differences in species richness among cordilleras  
421 and slopes of cordilleras of Colombia; Kattan *et al.*, 2004; Figure 4, Supplementary Figure 4). Alternative  
422 classifications also affect inferences about beta diversity; under current taxonomy, there is no species turnover along  
423 thousands of kilometers and across multiple geographic barriers from Mexico to Bolivia except for the local

424 replacements involving *H. anachoreta* and *H. negreti*. At the other extreme, if distinct lineages of *H. leucophrys* are  
425 species, then spatial turnover would be substantial even over relatively short distances (e.g., in Colombia), likely  
426 exacerbating differences among regions in beta diversity (Gaston *et al.*, 2007; Fjelds  *et al.*, 2012) and with potential  
427 conservation implications (Socolar *et al.*, 2016). Recognizing distinct lineages as species would also alter the perceived  
428 role of features of montane landscapes setting range limits and thus explaining spatial turnover in assemblages  
429 (Graham *et al.*, 2010).

430 In addition to affecting perceptions of patterns of diversity, our results have implications for thinking about historical  
431 processes underlying such patterns. The accumulation of biological diversity via diversification within a region like the  
432 montane Neotropics requires that (1) populations become isolated to initiate divergence, (2) budding population  
433 isolates persist in time, (3) populations expand their ranges and come into secondary sympatry, and (4) newly  
434 sympatric populations are differentiated enough that they may coexist without coalescing owing to hybridization or  
435 without excluding each other via competition (Mayr, 1942; Ricklefs & Bermingham, 2007). In the following we discuss  
436 our results in the context of these steps.

### 437 *Lineage splitting, persistence, and the origin of diversity*

438 A leading explanation for high tropical diversity involves latitudinal differences in net diversification rates (Fischer,  
439 1960; Schluter & Pennell, 2017). In particular, rapid diversification may explain the high species richness and  
440 concentration of narrow-ranged species of birds in tropical mountains, which cannot be accounted for by area or  
441 contemporary climate (Jetz *et al.*, 2004; Fjelds  *et al.*, 2012). Although evidence that diversification rates vary with  
442 latitude remains mixed in birds (Ricklefs, 2006; Martin & Tewksbury, 2008; Jetz *et al.*, 2012; Belmaker & Jetz, 2015)  
443 and other taxa (e.g. Pyron & Wiens, 2013; Pyron, 2014; Rolland *et al.*, 2014; Schluter, 2016; Rabosky *et al.*, 2018),  
444 tropical mountains are indeed hotbeds of rapid diversification (Madri an *et al.*, 2013). Furthermore, differences in the  
445 rate at which species originate may not be as important as the rate at which they go extinct in establishing broad-  
446 scale patterns in avian diversity (Hawkins *et al.*, 2006; Weir & Schluter, 2007; Pulido-Santacruz & Weir, 2016).  
447 Accordingly, the high diversity and endemism of tropical montane areas may reflect low extinction rates of species  
448 (Fjelds  *et al.*, 2012). In turn, higher diversification rates at higher elevations in montane areas (Quintero & Jetz,  
449 2018) may reflect both high speciation and low extinction (Fjelds  & Irestedt, 2009). A complementary historical  
450 explanation for diversity in tropical mountains which is less commonly addressed in the literature is high persistence of  
451 budding populations, an important control of rates of speciation (Mayr, 1963; Dynesius & Jansson, 2014; Rabosky,  
452 2016).

453 We found that the *H. leucophrys* complex radiated rapidly into multiple lineages, several of which have persisted for  
454 periods exceeding millions of years. Also, LTT plots suggest nearly constant rates of exponential accumulation of  
455 lineages over nearly 10 million years, with an apparent slowdown in diversification in the last million years. Although  
456 LTT plots with such a shape and their associated negative gamma statistic are often considered evidence of ecological  
457 limits to diversification (Rabosky & Hurlbert, 2015), we interpret the pattern more as an artifact of our methods  
458 resulting from (1) using species based on a model specifying a divergence threshold separating population-level  
459 processes (gene coalescence) from diversification dynamics (speciation and extinction) as units for analysis (Reid &  
460 Carstens, 2012), and (2) potential limitations in geographic sampling leading to failure to identify additional  
461 independent lineages of young age. Because the bGMYC analysis we employed to delimit presumptive species  
462 established an age cutoff of ca. 1 m.a. defining the units included in the LTT analysis, we simply conclude that  
463 diversification was nearly constant through much of the history of the *H. leucophrys* complex. To the extent that  
464 similar diversification dynamics may characterize evolutionary history of other Neotropical montane birds, high rates  
465 of lineage splitting (Harvey *et al.*, 2017b) and high persistence of such lineages over time (Smith *et al.*, 2017) have  
466 likely contributed to diversification and probably account for the high diversity of tropical montane systems and, more  
467 broadly, to large-scale biodiversity patterns such as latitudinal gradients in species richness.

### 468 *Range dynamics, secondary sympatry and the regional buildup of diversity*

469 Our data revealed that mtDNA lineages in the *H. leucophrys*, which likely diverged in geographic isolation, have come  
470 into secondary sympatry. This is most evident where divergent mtDNA lineages not sister to each other segregate  
471 with elevation. In addition to previously documented cases of elevational replacements of lineages involving distinct  
472 taxa (i.e. different species or subspecies in the Sierra Nevada de Santa Marta, in western Colombia, and in western  
473 Ecuador), we discovered a novel elevational replacement of distinct lineages in the Mérida Cordillera of Venezuela  
474 where no phenotypic differences had been noted. Likewise, previous work in other wood-wrens revealed that although  
475 *H. leucoptera* is nested within *H. leucosticta*, the lineage of *H. leucosticta* replaced by *H. leucoptera* at higher  
476 elevations in the Cordillera del Cóndor east of the Andes is distantly related to it, whereas its closest relative  
477 seemingly occurs in the Chocó region west of the Andes (Dingle *et al.*, 2006). The consistent pattern of elevational  
478 replacements involving fairly distant relatives as opposed to sister lineages fits the hypothesis that evolutionary  
479 divergence in tropical montane birds occurs largely in allopatry and not in parapatry along mountain slopes (Patton &  
480 Smith, 1992; García-Moreno & Fjeldså, 2000; Caro *et al.*, 2013).

481 In addition to documenting elevational replacements, we found evidence of regional co-occurrence of lineages replacing  
482 each other with latitude (e.g. along the cordilleras of Colombia and Ecuador). More fine-scaled sampling is required to  
483 determine whether geographic gaps separate the ranges of such lineages or if they come into close contact. Part of the  
484 observed genetic differentiation along the latitudinal axis may reflect the propensity of the linear distributions of  
485 tropical montane birds to become fragmented (Graves, 1988). However, some lineages replacing each other with  
486 latitude in a region are not sisters and may even be distantly related, which suggests range expansions and secondary  
487 contact rather than primary divergence along cordilleras.

488 Other intriguing phylogeographic patterns aside from secondary contact of lineages in elevational or latitudinal  
489 parapatry speak to the dynamism of geographic ranges over broad scales. For example, we found that populations of  
490 *H. leucophrys* from southern Mexico (Chiapas), Guatemala and El Salvador are not closely related to other Middle  
491 American populations; within a large, otherwise South American clade, these specimens appeared closest to *H. negreti*,  
492 a species endemic to western Colombia whose northernmost records are ca. 1700 km south of montane El Salvador.  
493 Likewise, the only sequence analyzed from Bolivia is a long branch more closely allied to lineages from northern South  
494 America (Colombia and Venezuela) than to geographically much closer lineages from Peru. Because closest relatives  
495 may occur in distant areas, spatial patterns of genetic variation are not easily accounted for by geography (e.g. by  
496 isolation-by-distance; Seeholzer & Brumfield, 2018). Given that such patterns are unlikely evidence of long-distance  
497 dispersal and are not unique to wood-wrens in the region (Cadena *et al.*, 2007), considering dynamics of expansion and  
498 contraction of geographic ranges involving localized extinctions is crucial to understand biogeographic and  
499 demographic processes underlying the distribution of genetic and species diversity in Neotropical birds.

500 Shifting climatic conditions affecting habitat connectivity drive changes in species ranges, thereby influencing  
501 phylogeographic patterns and the buildup of montane diversity (Ramírez-Barahona & Eguiarte, 2013; Flantua &  
502 Hooghiemstra, 2018). Species ranges may also experience phases of expansion and contraction linked to shifts in  
503 ecological specialization and interactions with natural enemies (i.e. the taxon cycle; Wilson, 1959; Ricklefs &  
504 Bermingham, 2002). Although taxon cycles are more evident in insular settings with discrete populations and areas  
505 (e.g., Ricklefs & Bermingham, 1999; Jönsson *et al.*, 2014), they may also take place in continents (Graves, 1982). In  
506 fact, lineages experiencing the taxon cycle may account for what one might call continental great speciators like  
507 *Henicorhina* wood-wrens, which occur widely in space -revealing an ability to expand their ranges- yet split into  
508 isolated populations at a fast rate due to cessation of gene flow (cf. Diamond *et al.*, 1976). Wood-wrens disperse little  
509 at present because of their morphology and ecology, which arguably explain their remarkable patterns of genetic  
510 structure reflecting long-term population isolation. However, our findings that wood-wrens dispersed throughout much  
511 of the montane Neotropics from a northern area of origin and that several lineages achieved secondary sympatry  
512 indicate that episodes of range expansion interspersed with periods of divergence occurred at various moments,  
513 possibly in sync with morphological or behavioral changes influencing their abilities to disperse (Pigot & Tobias, 2015;  
514 Hosner *et al.*, 2017). Furthermore, gaps separating the ranges of closely related lineages of wood-wrens arguably reflect  
515 extinctions of intervening populations of formerly widespread lineages, which left vacant spaces that could, in turn,  
516 become occupied by other expanding lineages.

517 Phylogeographers will often not detect range dynamics embodied in the taxon cycle because incomplete reproductive  
518 isolation between young lineages can result in homogenization of gene pools upon secondary contact (Kearns *et al.*,  
519 2018). Furthermore, niche similarities between incipient species achieving contact may preclude long-term sympatry  
520 owing to interspecific competition (Pigot & Tobias, 2013). Irrespective of whether the patterns we observed resulted  
521 from the taxon cycle, we identified aspects making the *H. leucophrys* complex well suited for further work on the  
522 origins of tropical diversity and its accumulation over time and space. Our results and other work on the complex  
523 reveal that the completion of reproductive isolation between lineages meeting in secondary sympatry seemingly  
524 exhibits a continuum ranging from neutral divergence with no obvious phenotypic differences (forms in montane  
525 Venezuela), to phenotypic and behavioral divergence with persistent interbreeding (*hilaris* and nominate *leucophrys* in  
526 Ecuador), to completed speciation with little to no hybridization (anachoreta and negreti vs. various forms of  
527 leucophrys in Colombia; Salaman *et al.*, 2003; Dingle *et al.*, 2008; Dingle *et al.*, 2010; Caro *et al.*, 2013; Burbidge *et*  
528 *al.*, 2015; Halfwerk *et al.*, 2016). Furthermore, divergence in elevational ranges occurring during periods of isolation  
529 (Cadena, 2007; Tobias *et al.*, 2014) or arising in secondary sympatry (Diamond, 1973; Freeman, 2015) has enabled  
530 coexistence of lineages at the landscape scale in various regions. Given that range boundaries may be maintained –and  
531 possibly reinforced– evolutionarily by phenotypic and behavioral barriers to interbreeding and ecologically by  
532 competition (Jankowski *et al.*, 2010), our study has uniquely captured wood-wren populations in the act of building up  
533 diversity via divergence and persistence in allopatry, achievement of secondary sympatry, and coexistence mediated by  
534 ecological and evolutionary divergence. Comparative work on the structure and dynamics of contact zones between  
535 lineages should provide rich insights into the origin and maintenance of high diversity in tropical mountains.

536

## 537 **Acknowledgements**

538 We are grateful to the institutions allowing access to tissue samples for our study: Academy of Natural Sciences of  
539 Drexel University, Burke Museum of Natural History and Culture at University of Washington, Colección  
540 Ornitológica Phelps, The Field Museum, Instituto Alexander von Humboldt, Instituto de Ciencias Naturales at  
541 Universidad Nacional de Colombia, Louisiana State University Museum of Natural Science, Museum of Vertebrate  
542 Zoology at UC Berkeley, Peabody Museum of Natural History at Yale University, and the Zoological Museum at the  
543 University of Copenhagen. We thank field collectors and field assistants for their crucial role in obtaining samples, as  
544 well as researchers who conducted groundbreaking work on our study system, made their sequences available and  
545 assisted us in various ways: Caroline Dingle, Lina Caro, and colleagues. Our work received financial support from the  
546 Facultad de Ciencias at Universidad de los Andes, and the Centro de Desarrollo Científico y Humanístico de la  
547 Universidad Central de Venezuela. Permits were granted by the Oficina Nacional de Diversidad Biológica, Ministerio  
548 del Poder Popular para el Ambiente, Venezuela.

## 549 **Literature Cited**

- 550 Aguilar, C., De León, L.F., Loaiza, J.R., McMillan, W.O. & Miller, M.J. (2014) Extreme sequence divergence between  
551 mitochondrial genomes of two subspecies of White-breasted Wood-wren (*Henicorhina leucosticta*, Cabanis,  
552 1847) from western and central Panamá. *Mitochondrial DNA*, **27**, 956-957.
- 553 Bacon, C.D., Silvestro, D., Jaramillo, C., Smith, B.T., Chakrabarty, P. & Antonelli, A. (2015) Biological evidence  
554 supports an early and complex emergence of the Isthmus of Panama. *Proceedings of the National Academy*  
555 *of Sciences of the USA*, **112**, 6110-6115.
- 556 Badgley, C., Smiley, T.M., Terry, R., Davis, E.B., DeSantis, L.R.G., Fox, D.L., Hopkins, S.S.B., Jezkova, T., Matocq,  
557 M.D., Matzke, N., McGuire, J.L., Mulch, A., Riddle, B.R., Roth, V.L., Samuels, J.X., Strömberg, C.A.E. &  
558 Yanites, B.J. (2017) Biodiversity and topographic complexity: Modern and geohistorical perspectives. *Trends*  
559 *in Ecology and Evolution*, **32**, 211-226.
- 560 Bapst, D.W. (2012) paleotree: an R package for paleontological and phylogenetic analyses of evolution. *Methods in*  
561 *Ecology and Evolution*, **3**, 803-807.
- 562 Barber, B.R. & Klicka, J. (2010) Two pulses of diversification across the Isthmus of Tehuantepec in a montane  
563 Mexican bird fauna. *Proceedings of the Royal Society of London B*, **277**, 2675-2681.

- 564 Barker, F.K. (2007) Avifaunal interchange across the Panamanian Isthmus: insights from *Campylorhynchus* wrens.  
565 *Biological Journal of the Linnean Society*, **90**, 687-702.
- 566 Barker, F.K. (2017) Molecular phylogenetics of the wrens and allies (Passeriformes: Certhioidea), with comments on  
567 the relationships of *Ferminia*. *American Museum Novitates*, **3887**, 1-27.
- 568 Barker, F.K., Burns, K.J., Klicka, J., Lanyon, S.M. & Lovette, I.J. (2015) New insights into New World biogeography:  
569 An integrated view from the phylogeny of blackbirds, cardinals, sparrows, tanagers, warblers, and allies. *Auk*,  
570 **132**, 333-348.
- 571 Barrantes, G. (2009) The role of historical and local factors in determining species composition of the highland  
572 avifauna of Costa Rica and Western Panama. *Revista de Biología Tropical*, **57 (Suppl. 1)**, 333-349.
- 573 Barrowclough, G.F., Cracraft, J., Klicka, J. & Zink, R.M. (2016) How many kinds of birds are there and why does it  
574 matter? *PLoS One*, **11**, e0166307.
- 575 Becker, C.D., Richardson, E.A. & Brown, S.J. (2007) MtDNA haplotypes, sequence divergence, and morphological  
576 variation in Gray-breasted Wood Wrens (*Henicorhina leucophrys*) and their conservation implications.  
577 *Journal of Field Ornithology*, **78**, 117-123.
- 578 Belmaker, J. & Jetz, W. (2015) Relative roles of ecological and energetic constraints, diversification rates and region  
579 history on global species richness gradients. *Ecology Letters*, **18**, 563-571.
- 580 Benham, P.M., Cuervo, A.M., McGuire, J.A. & Witt, C.C. (2015) Biogeography of the Andean metaltail  
581 hummingbirds: contrasting evolutionary histories of tree line and habitat-generalist clades. *Journal of*  
582 *Biogeography*, **42**, 763-777.
- 583 Bertuzzo, E., Carrara, F., Mari, L., Altermatt, F., Rodriguez-Iturbe, I. & Rinaldo, A. (2016) Geomorphic controls on  
584 elevational gradients of species richness. *Proceedings of the National Academy of Sciences of the United*  
585 *States of America*, **113**, 1737-1742.
- 586 Burbidge, T., Parson, T., Caycedo-Rosales, P.C., Cadena, C.D. & Slabbekoorn, H. (2015) Playbacks revisited:  
587 asymmetry in behavioural response across an acoustic boundary between two parapatric bird species.  
588 *Behaviour*, **152**, 1933-1951.
- 589 Burney, C.W. & Brumfield, R.T. (2009) Ecology predicts levels of genetic differentiation in Neotropical birds.  
590 *American Naturalist*, **174**, 358-368.
- 591 Cadena, C.D. (2007) Testing the role of interspecific competition in the evolutionary origin of elevational zonation: an  
592 example with *Buarremon* brush-finches (Aves, Emberizidae) in the neotropical mountains. *Evolution*, **61**,  
593 1120-1136.
- 594 Cadena, C.D., Klicka, J. & Ricklefs, R.E. (2007) Evolutionary differentiation in the Neotropical montane region:  
595 molecular phylogenetics and phylogeography of *Buarremon* brush-finches (Aves, Emberizidae). *Molecular*  
596 *Phylogenetics and Evolution*, **44**, 993-1016.
- 597 Cadena, C.D., Cheviron, Z.A. & Funk, W.C. (2011) Testing the molecular and evolutionary causes of a 'leapfrog'  
598 pattern of geographical variation in coloration. *Journal of Evolutionary Biology*, **24**, 402-414.
- 599 Cadena, C.D., Caro, L.M., Caycedo, P.C., Cuervo, A.M., Bowie, R.C.K. & Slabbekoorn, H. (2016) *Henicorhina*  
600 *anachoreta* (Troglodytidae), another endemic bird species for the Sierra Nevada de Santa Marta, Colombia  
601 *Ornitología Colombiana*, **15**, 82-89.
- 602 Cadena, C.D., Kozak, K.H., Gómez, J.P., Parra, J.L., McCain, C.M., Bowie, R.C.K., Carnaval, A.C., Moritz, C.,  
603 Rahbek, C., Roberts, T.E., Sanders, N.J., Schneider, C.J., VanDerWal, J., Zamudio, K.R. & Graham, C.H.  
604 (2012) Latitude, elevational climatic zonation, and speciation in New World vertebrates. *Proceedings of the*  
605 *Royal Society of London B*, **279**, 194-201.
- 606 Campagna, L., St. Clair, J.H., Lougheed, S.C., Woods, R.W., Imberti, S. & Tubaro, P.L. (2012) Divergence between  
607 passerine populations from the Malvinas – Falkland Islands and their continental counterparts: a  
608 comparative phylogeographical study. *Biological Journal of the Linnean Society*, **106**, 865-879.
- 609 Caro, L.M., Caycedo-Rosales, P.C., Bowie, R.C.K., Slabbekoorn, H. & Cadena, C.D. (2013) Ecological speciation  
610 along an elevational gradient in a tropical passerine bird? *Journal of Evolutionary Biology*, **26**, 357-374.
- 611 Carstens, B., Pelletier, T.A., Reid, N.M. & Satler, J.D. (2013) How to fail at species delimitation. *Molecular Ecology*,  
612 **22**, 4369-4383.
- 613 Chaves, J.A., Weir, J.T. & Smith, T.B. (2011) Diversification in *Adelomyia* hummingbirds follows Andean uplift.  
614 *Molecular Ecology*, **20**, 4564-4576.

- 615 Claramunt, S. & Cracraft, J. (2015) A new time tree reveals Earth history's imprint on the evolution of modern birds.  
616 *Science Advances*, **1**, e1501005.
- 617 Claramunt, S., Derryberry, E.P., Remsen, J.V., Jr. & Brumfield, R.T. (2012) High dispersal ability inhibits speciation  
618 in a continental radiation of passerine birds. *Proceedings of the Royal Society of London B*, **279**, 1567-1574.
- 619 D'Horta, F.M., Cuervo, A.M., Ribas, C.C., Brumfield, R.T. & Miyaki, C.Y. (2013) Phylogeny and comparative  
620 phylogeography of *Sclerurus* (Aves: Furnariidae) reveal constant and cryptic diversification in an old  
621 radiation of rain forest understorey specialists. *Journal of Biogeography*, **40**, 37-49.
- 622 de Queiroz, K. (1998) The general lineage concept of species, species criteria, and the process of speciation. *Endless*  
623 *forms: species and speciation* (ed. by D.J. Howard and S.H. Berlocher), pp. 57-75. Oxford University Press,  
624 New York.
- 625 de Queiroz, K. (2007) Species concepts and species delimitation. *Systematic Biology*, **56**, 879-886.
- 626 Diamond, J., Gilpin, M.E. & Mayr, E. (1976) Species-distance relation for birds of the Solomon Archipelago, and the  
627 paradox of the great speciators. *Proceedings of the National Academy of Sciences of the United States of*  
628 *America*, **73**, 2160-2164.
- 629 Diamond, J.M. (1973) Distributional ecology of New Guinea birds. *Science*, **179**, 759-769.
- 630 Dingle, C., Halfwer, W. & Slabbekoorn, H. (2008) Habitat-dependent song divergence at subspecies level in the grey-  
631 breasted wood-wren. *Journal of Evolutionary Biology*, **21**, 1079-1089.
- 632 Dingle, C., Lovette, I.J., Canaday, C. & Smith, T.B. (2006) Elevational zonation and the phylogenetic relationships of  
633 the *Henicorhina* wood-wrens. *Auk*, **123**, 119-134.
- 634 Dingle, C., Poelstra, J.W., Halfwerk, W., Brinkhuizen, D.M. & Slabbekoorn, H. (2010) Asymmetric response patterns  
635 to subspecies-specific song differences in allopatry and parapatry in the gray-breasted wood-wren. *Evolution*,  
636 **64**, 3537-3548.
- 637 Drummond, A.J., Suchard, M.A., Xie, D. & Rambaut, A. (2012) Bayesian phylogenetics with BEAUti and the  
638 BEAST 1.7. *Molecular Biology and Evolution*, **29**, 1969-1973.
- 639 Dynesius, M. & Jansson, R. (2014) Persistence of within-species lineages: a neglected control of speciation rates.  
640 *Evolution*, **68**, 923-934.
- 641 Fine, P.V.A. (2015) Ecological and evolutionary drivers of geographic variation in species diversity. *Annual Review of*  
642 *Ecology, Evolution and Systematics*, **46**, 369-392.
- 643 Fischer, A.G. (1960) Latitudinal variations in organic diversity. *Evolution*, **14**, 64-81.
- 644 Fitzpatrick, J.W., Terborgh, J.W. & Willard, D.E. (1977) A new species of wood-wren from Peru. *Auk*, **94**, 195-201.
- 645 Fjelds , J. (2013) The discovery of new bird species. *Handbook of the Birds of the World, Special Volume: New*  
646 *Species and Global Index* (ed. by J. Del Hoyo, A. Elliot, J. Sargatal and D.A. Christie), pp. 147-185. Lynx  
647 Edicions, Barcelona.
- 648 Fjelds , J. & Irestedt, M. (2009) Diversification of the South American avifauna: patterns and implications for  
649 conservation in the Andes. *Annals of the Missouri Botanical Garden*, **96**, 398-409.
- 650 Fjelds , J., Bowie, R.C.K. & Rahbek, C. (2012) The role of mountain ranges in the diversification of birds. *Annual*  
651 *Review of Ecology, Evolution and Systematics*, **43**, 249-265.
- 652 Flantua, S.G.A. & Hooghiemstra, H. (2018) Historical connectivity and mountain biodiversity. *Mountains, Climate*  
653 *and Biodiversity* (ed. by C. Hoorn, A. Perrigo and A. Antonelli), pp. 171-185. John Wiley & Sons.
- 654 Francis, A.P. & Currie, D.J. (2003) A globally consistent richness-climate relationship for angiosperms. *American*  
655 *Naturalist*, **161**, 523-536.
- 656 Freeman, B. (2015) Competitive interactions upon secondary contact drive elevational divergence in tropical birds.  
657 *American Naturalist*, **186**, 470-479.
- 658 Galen, S.C. & Witt, C.C. (2014) Diverse avian malaria and other haemosporidian parasites in Andean house wrens:  
659 evidence for regional co-diversification by host-switching. *Journal of Avian Biology*, **45**, 374-386.
- 660 Garc a-Moreno, J. & Fjelds , J. (2000) Chronology and mode of speciation in the Andean avifauna. *Isolated*  
661 *Vertebrate Communities in the Tropics* (ed. by G. Rheinwald), pp. 25-46. Proc. 4th Int. Symp, Bonn. Zool.  
662 Monogr. 46, Bonn.
- 663 Gaston, K.J., Davies, R.G., Orme, C.D.L., Olson, V.A., Thomas, G.H., Ding, T.-S., Rasmussen, P.C., Lennon, J.J.,  
664 Bennett, P.M., Owens, I.P.F. & Blackburn, T.M. (2007) Spatial turnover in the global avifauna. *Proceedings*  
665 *of the Royal Society of London B*, **274**, 1567-1574.

- 666 Gehara, M., Barth, A., Oliveira, E.F., Costa, M.A., Haddad, C.F.B. & Vences, M. (2017) Model-based analyses reveal  
667 insular population diversification and cryptic frog species in the *Ischnocnema parva* complex in the Atlantic  
668 forest of Brazil. *Molecular Phylogenetics and Evolution*, **112**, 68-78.
- 669 Gill, F.B. (2014) Species taxonomy of birds: Which null hypothesis? *Auk*, **131**, 150-161.
- 670 Graham, C.H., Silva, N. & Velásquez-Tibatá, J. (2010) Evaluating the potential causes of range limits of birds of the  
671 Colombian Andes. *Journal of Biogeography*, **37**, 1863-1875.
- 672 Graham, C.H., Carnaval, A.C., Cadena, C.D., Zamudio, K.R., Roberts, T.E., Parra, J.L., McCain, C.M., Bowie,  
673 R.C.K., Moritz, C., Baines, S.B., Schneider, C.J., VanDerWal, J., Rahbek, C., Kozak, K.H. & Sanders, N.J.  
674 (2014) The origin and maintenance of montane diversity: integrating evolutionary and ecological processes.  
675 *Ecography*, **37**, 711-719.
- 676 Graves, G.R. (1982) Speciation in the carbonated flower-piercer (*Diglossa carbonaria*) complex in the Andes. *Condor*,  
677 **84**, 1-14.
- 678 Graves, G.R. (1988) Linearity of geographic range and its possible effect on the population structure of Andean birds.  
679 *Auk*, **105**, 47-52.
- 680 Guangchuang, Y., K., S.D., Huachen, Z., Yi, G. & Tsan-Yuk, L.T. (2017) ggtree: an r package for visualization and  
681 annotation of phylogenetic trees with their covariates and other associated data. *Methods in Ecology and*  
682 *Evolution*, **8**, 28-36.
- 683 Gutiérrez-Pinto, N., Cuervo, A.M., Miranda, J., Pérez-Emán, J.L., Brumfield, R.T. & Cadena, C.D. (2012) Non-  
684 monophyly and deep genetic differentiation across low-elevation barriers in a Neotropical montane bird  
685 (*Basileuterus tristriatus*; Aves: Parulidae). *Molecular Phylogenetics and Evolution*, **64**, 156-165.
- 686 Halfwerk, W., Dingle, C., Brinkhuizen, D.M., Poelstra, J.W., Komdeur, J. & Slabbekoorn, H. (2016) Sharp acoustic  
687 boundaries across an altitudinal avian hybrid zone despite asymmetric introgression. *Journal of Evolutionary*  
688 *Biology*, **29**, 1356-1367.
- 689 Harvey, M.G., Aleixo, A., Ribas, C.C. & Brumfield, R.T. (2017a) Habitat association predicts genetic diversity and  
690 population divergence in Amazonian birds. *American Naturalist*, **190**, 631-648.
- 691 Harvey, M.G., Seeholzer, G.F., Smith, B.T., Rabosky, D.L., Cuervo, A.M. & Brumfield, R.T. (2017b) Positive  
692 association between population genetic differentiation and speciation rates in New World birds. *Proceedings*  
693 *of the National Academy of Sciences of the United States of America*, **114**, 6328-6333.
- 694 Hawkins, B.A., Diniz-Filho, J.A.F., Jaramillo, C.A. & Soeller, S.A. (2006) Post-Eocene climate change, niche  
695 conservatism, and the latitudinal diversity gradient of New World birds. *Journal of Biogeography*, **33**, 770-  
696 780.
- 697 Hawkins, B.A., Field, R., Cornell, H.V., Currie, D.J., Guégan, J.-F., Kaufman, D.M., Kerr, J.T., Mittlebach, G.G.,  
698 Oberdorff, T., O'Brien, E.M., Porter, E.E. & Turner, J.R.G. (2003) Energy, water, and broad-scale  
699 geographic patterns of species richness. *Ecology*, **84**, 3105-3117.
- 700 Hazzi, N.A., Moreno, J.S., Ortiz-Movliav, C. & Palacio, R.D. (2018) Biogeographic regions and events of isolation and  
701 diversification of the endemic biota of the tropical Andes. *Proceedings of the National Academy of Sciences*,  
702 Hosner, P.A., Tobias, J.A., Braun, E.L. & Kimball, R.T. (2017) How do seemingly non-vagile clades accomplish trans-  
703 marine dispersal? Trait and dispersal evolution in the landfowl (Aves: Galliformes). *Proceedings of the Royal*  
704 *Society of London B*, **284**, 20170210.
- 705 Isler, M.L., Cuervo, A.M., Bravo, G.A. & Brumfield, R.T. (2012) An integrative approach to species-level systematics  
706 reveals the depth of diversification in an Andean thamnophilid, the Long-tailed Antbird. *Condor*, **114**, 571-  
707 583.
- 708 Jankowski, J.E., Robinson, S.K. & Levey, D.J. (2010) Squeezed at the top: Interspecific aggression may constrain  
709 elevational ranges in tropical birds. *Ecology*, **91**, 1877-1884.
- 710 Jankowski, J.E., Ciecka, A.L., Meyer, N.Y. & Rabenold, K.N. (2009) Beta diversity along environmental gradients:  
711 implications of habitat specialization in tropical montane landscapes. *Journal of Animal Ecology*, **78**, 315-327.
- 712 Jetz, W. & Rahbek, C. (2002) Geographic range size and determinants of avian species richness. *Science*, **297**, 1548-  
713 1551.
- 714 Jetz, W., Rahbek, C. & Colwell, R.K. (2004) The coincidence of rarity and richness and the potential signature of  
715 history in centres of endemism. *Ecology Letters*, **7**, 1180-1191.
- 716 Jetz, W., Thomas, G.H., Joy, J.B., Hartmann, K. & Mooers, A.O. (2012) The global diversity of birds in space and  
717 time. *Nature*, **491**, 444-448.



- 718 Jönsson, K.A., Irestedt, M., Christidis, L., Clegg, S.M., Holt, B.G. & Fjeldså, J. (2014) Evidence of taxon cycles in an  
719 Indo-Pacific passerine bird radiation (Aves: *Pachycephala*). *Proceedings of the Royal Society B: Biological*  
720 *Sciences*, **281**, 20131727.
- 721 Joseph, L., Wilke, T., Bermingham, E., Alpers, D. & Ricklefs, R. (2004) Towards a phylogenetic framework for the  
722 evolution of shakes, rattles, and rolls in *Myiarchus* tyrant-flycatchers (Aves: Passeriformes: Tyrannidae).  
723 *Molecular Phylogenetics and Evolution*, **31**, 139-152.
- 724 Kapli, P., Lutteropp, S., Zhang, J., Kobert, K., Pavlidis, P., Stamatakis, A. & Flouri, T. (2017) Multi-rate Poisson  
725 tree processes for single-locus species delimitation under maximum likelihood and Markov chain Monte Carlo.  
726 *Bioinformatics*, **33**, 1630-1638.
- 727 Kattan, G.H., Franco, P., Rojas, V. & Morales, G. (2004) Biological diversification in a complex region: a spatial  
728 analysis of faunistic diversity and biogeography of the Andes of Colombia. *Journal of Biogeography*, **31**, 1829-  
729 1839.
- 730 Kearns, A.M., Restani, M., Szabo, I., Schröder-Nielsen, A., Kim, J.A., Richardson, H.M., Marzluff, J.M., Fleischer,  
731 R.C., Johnsen, A. & Omland, K.E. (2018) Genomic evidence of speciation reversal in ravens. *Nature*  
732 *Communications*, **9**, 906.
- 733 Kroodsma, D.E. & Brewer, D. (2005) Family Troglodytidae (wrens). *Handbook of birds of the world: Volume 10,*  
734 *Cuckoo-shrikes to thrushes* (ed. by J. Del Hoyo, A. Elliot and D. Christie), pp. 356-447. Lynx Edicions,  
735 Barcelona.
- 736 Laiolo, P., Pato, J. & Obeso, J.R. (2018) Ecological and evolutionary drivers of the elevational gradient of diversity.  
737 *Ecology Letters*, **21**, 1022-1032.
- 738 Madriñán, S., Cortés, A.J. & Richardson, J.E. (2013) Páramo is the world's fastest evolving and coolest biodiversity  
739 hotspot. *Frontiers in Genetics*, **4**, 192.
- 740 Martin, P.R. & Tewksbury, J.J. (2008) Latitudinal variation in subspecific diversification of birds. *Evolution*, **62**, 2775-  
741 2788.
- 742 Mayr, E. (1942) *Systematics and the origin of species*. Columbia University Press, New York.
- 743 Mayr, E. (1946) The number of species of birds. *Auk*, **63**, 64-69.
- 744 Mayr, E. (1963) *Animal species and evolution*. Harvard University Press, Cambridge, Massachusetts.
- 745 McCain, C.M. (2009) Global analysis of bird elevational diversity. *Global Ecology and Biogeography*, **18**, 346-360.
- 746 Moore, R.P., Robinson, W.D., Lovette, I.J. & Robinson, T.R. (2008) Experimental evidence for extreme dispersal  
747 limitation in tropical forest birds. *Ecology Letters*, **11**, 960-968.
- 748 Moyle, R.G., Oliveros, C.H., Andersen, M.J., Hosner, P.A., Benz, B.W., Manthey, J.D., Travers, S.L., Brown, R.M. &  
749 Faircloth, B.C. (2016) Tectonic collision and uplift of Wallacea triggered the global songbird radiation.  
750 *Nature Communications*, **7**, 12709.
- 751 Orme, C.D.L., Davies, R.G., Burgess, M., Eigenbrod, F., Pickup, N., Olson, V.A., Webster, A.J., Ding, T.-S.,  
752 Rasmussen, P.C., Ridgely, R.S., Stattersfield, A.J., Bennett, P.M., Blackburn, T.M., Gaston, K.J. & Owens,  
753 I.P.F. (2005) Global hotspots of species richness are not congruent with endemism or threat. *Nature*, **436**,  
754 1016-1019.
- 755 Paradis, E., Claude, J. & Strimmer, K. (2004) APE: Analyses of Phylogenetics and Evolution in R language.  
756 *Bioinformatics*, **20**, 289-290.
- 757 Parra, J.L., Remsen Jr., J.V., Alvarez-Rebolledo, M. & McGuire, J.A. (2009) Molecular phylogenetics of the  
758 hummingbird genus *Coeligena*. *Molecular Phylogenetics and Evolution*, **53**, 425-434.
- 759 Patterson, B.D., Stotz, D.F., Solari, S., Fitzpatrick, J.W. & Pacheco, V. (1998) Contrasting patterns of elevational  
760 zonation for birds and mammals in the Andes of southeastern Peru. *Journal of Biogeography*, **25**, 593-607.
- 761 Patton, J.L. & Smith, M.F. (1992) mtDNA phylogeny of Andean mice: a test of diversification across ecological  
762 gradients. *Evolution*, **46**, 174-183.
- 763 Pérez-Emán, J.L. (2005) Molecular phylogenetics and biogeography of the Neotropical redstarts (*Myioborus*; Aves,  
764 Parulinae). *Molecular Phylogenetics and Evolution*, **37**, 511-528.
- 765 Peters, M.K., Hemp, A., Appelhans, T., Behler, C., Classen, A., Detsch, F., Ensslin, A., Ferger, S.W., Frederiksen,  
766 S.B., Gebert, F., Haas, M., Helbig-Bonitz, M., Hemp, C., Kindeketa, W.J., Mwangomo, E., Ngereza, C.,  
767 Otte, I., Röder, J., Rutten, G., Costa, D.S., Tardanico, J., Zancolli, G., Deckert, J., Eardley, C.D., Peters,  
768 R.S., Rödel, M.-O., Schleunig, M., Ssymank, A., Kakengi, V., Zhang, J., Böhning-Gaese, K., Brandl, R.,  
769 Kalko, E.K.V., Kleyer, M., Nauss, T., Tschapka, M., Fischer, M. & Steffan-Dewenter, I. (2016) Predictors of

- 770 elevational biodiversity gradients change from single taxa to the multi-taxa community level. *Nature*  
771 *Communications*, **7**, 13736.
- 772 Pigot, A.L. & Tobias, J. (2013) Species interactions constrain geographic range expansion over evolutionary time.  
773 *Ecology Letters*, **16**, 330-338.
- 774 Pigot, A.L. & Tobias, J.A. (2015) Dispersal and the transition to sympatry in vertebrates. *Proceedings of the Royal*  
775 *Society of London B*, **282**, 20141929.
- 776 Posada, D. (2008) jModelTest: phylogenetic model averaging. *Molecular Biology and Evolution*, **25**, 1253-1256.
- 777 Price, T.D., Hooper, D.M., Buchanan, C.D., Johansson, U.S., Tietze, D.T., Alström, P., Olsson, U., Ghosh-Harihar,  
778 M., Ishtiaq, F., Gupta, S.K., Martens, J., Harr, B., Singh, P. & Mohan, D. (2014) Niche filling slows the  
779 diversification of Himalayan songbirds. *Nature*, **509**, 222-225.
- 780 Prieto-Torres, D.A., Cuervo, A.M. & Bonaccorso, E. (2018) On geographic barriers and Pleistocene glaciations:  
781 Tracing the diversification of the Russet-crowned Warbler (*Myiothlypis coronata*) along the Andes. *PLoS*  
782 *One*, **13**, e0191598.
- 783 Pulido-Santacruz, P. & Weir, J.T. (2016) Extinction as a driver of avian latitudinal diversity gradients. *Evolution*, **70**,  
784 860-872.
- 785 Pulido-Santacruz, P., Aleixo, A. & Weir, J.T. (2018) Morphologically cryptic Amazonian bird species pairs exhibit  
786 strong postzygotic reproductive isolation. *Proceedings of the Royal Society of London B*, **285**, 20172081.
- 787 Pybus, O.G., Rambaut, A. & Harvey, P.H. (2000) An integrated framework for the inference of viral population  
788 history from reconstructed genealogies. *Genetics*, **155**, 1429-1437.
- 789 Pyron, R.A. (2014) Temperate extinction in squamate reptiles and the roots of latitudinal diversity gradients. *Global*  
790 *Ecology and Biogeography*, **23**, 1126-1134.
- 791 Pyron, R.A. & Wiens, J.J. (2013) Large-scale phylogenetic analyses reveal the causes of high tropical amphibian  
792 diversity. *Proceedings of the Royal Society of London B*, **280**, 20131622.
- 793 Quintero, I. & Jetz, W. (2018) Global elevational diversity and diversification of birds. *Nature*, **555**, 246-250.
- 794 Rabosky, D.L. (2016) Reproductive isolation and the causes of speciation rate variation in nature. *Biological Journal*  
795 *of the Linnean Society*, **118**, 13-25.
- 796 Rabosky, D.L. & Hurlbert, A.H. (2015) Species richness at continental scales Is dominated by ecological limits. *The*  
797 *American Naturalist*, **185**, 572-583.
- 798 Rabosky, D.L., Santini, F., Eastman, J., Smith, S.A., Sidlauskas, B., Chang, J. & Alfaro, M.E. (2013) Rates of  
799 speciation and morphological evolution are correlated across the largest vertebrate radiation. *Nature*  
800 *Communications*, **4**, 1958.
- 801 Rabosky, D.L., Chang, J., Title, P.O., Cowman, P.F., Sallan, L., Friedman, M., Kaschner, K., Garilao, C., Near, T.J.,  
802 Coll, M. & Alfaro, M.E. (2018) An inverse latitudinal gradient in speciation rate for marine fishes. *Nature*,  
803 **559**, 392-395.
- 804 Rahbek, C. & Graves, G.R. (2001) Multiscale assessment of patterns of avian species richness. *Proceedings of the*  
805 *National Academy of Sciences of the USA*, **98**, 4534-4539.
- 806 Rahbek, C., Gotelli, N.J., Colwell, R.K., Entsminger, G.L., Rangel, T.F.L.V.B. & Graves, G.R. (2007) Predicting  
807 continental-scale patterns of bird species richness with spatially explicit models. *Proceedings of the Royal*  
808 *Society of London B*, **274**, 165-174.
- 809 Ramírez-Barahona, S. & Eguiarte, L.E. (2013) The role of glacial cycles in promoting genetic diversity in the  
810 Neotropics: the case of cloud forests during the Last Glacial Maximum. *Ecology and Evolution*, **3**, 725-738.
- 811 Reid, N.M. & Carstens, B.C. (2012) Phylogenetic estimation error can decrease the accuracy of species delimitation: a  
812 Bayesian implementation of the general mixed Yule-coalescent model. *BMC Evolutionary Biology*, **12**, 196.
- 813 Remsen, J.V., Jr. (2016) A “rapid assessment program” for assigning species rank? *Journal of Field Ornithology*, **87**,  
814 110-115.
- 815 Remsen, J.V., Jr. & Graves, W.S. (1995) Distribution patterns and zoogeography of *Atlapetes* brush-finches  
816 (Emberizinae) of the Andes. *Auk*, **112**, 210-224.
- 817 Remsen, J.V., Jr., Areta, J.I., Cadena, C.D., Claramunt, S., Jaramillo, A., Pacheco, J.F., Robbins, M.B., Stiles, F.G.,  
818 Stotz, D.F. & Zimmer, K.J. (2018) *A classification of the bird species of South America, version July 7 2018*.  
819 American Ornithologists' Union. <http://www.museum.lsu.edu/~Remsen/SACCBaseline.htm>.
- 820 Revell, L.J. (2012) phytools: an R package for phylogenetic comparative biology (and other things). *Methods in*  
821 *Ecology and Evolution*, **3**, 217-223.

- 822 Ribas, C.C., Moyle, R.G., Miyaki, C.Y. & Cracraft, J. (2007) The assembly of montane biotas: linking Andean  
823 tectonics and climatic oscillations to independent regimes of diversification in *Pionus* parrots. *Proceedings of*  
824 *the Royal Society of London B*, **274**, 2399-2408.
- 825 Ricklefs, R.E. (2006) Global variation in the diversification rate of passerine birds. *Ecology*, **87**, 2468-2478.
- 826 Ricklefs, R.E. & Bermingham, E. (1999) Taxon cycles in the Lesser Antillean avifauna. *Ostrich*, **70**, 49-59.
- 827 Ricklefs, R.E. & Bermingham, E. (2002) The concept of the taxon cycle in biogeography. *Global Ecology and*  
828 *Biogeography*, **11**, 353-361.
- 829 Ricklefs, R.E. & Bermingham, E. (2007) The causes of evolutionary radiations in archipelagoes: passerine birds in the  
830 Lesser Antilles. *American Naturalist*, **169**, 285-297.
- 831 Ritchie, A.M., Lo, N. & Ho, S.Y.W. (2017) The Impact of the tree prior on molecular dating of data sets containing a  
832 mixture of inter- and intraspecies sampling. *Systematic Biology*,
- 833 Robbins, M.B. & Nyári, Á.S. (2014) Canada to Tierra del Fuego: Species limits and historical biogeography of the  
834 Sedge Wren (*Cistothorus platensis*). *Wilson Journal of Ornithology*, **126**, 649-662.
- 835 Rolland, J., Condamine, F.L., Jiguet, F. & Morlon, H. (2014) Faster speciation and reduced extinction in the tropics  
836 contribute to the mammalian latitudinal diversity gradient. *PLoS Biology*, **12**, e1001775.
- 837 Roux, C., Fraïsse, C., Romiguier, J., Anciaux, Y., Galtier, N. & Bierne, N. (2016) Shedding light on the grey zone of  
838 speciation along a continuum of genomic divergence. *PLoS Biology*, **14**, e2000234.
- 839 Ruggiero, A. & Hawkins, B.A. (2008) Why do mountains support so many species of birds? *Ecography*, **31**, 306-315.
- 840 Salaman, P., Coopmans, P., Donegan, T.M., Mulligan, M., Cortés, A., Hilty, S.L. & Ortega, L.A. (2003) A new  
841 species of wood-wren (Troglodytidae: *Henicorhina*) from the Western Andes of Colombia. *Ornitología*  
842 *Colombiana*, **1**, 4-21.
- 843 Salisbury, C.L., Seddon, N., Cooney, C.R. & Tobias, J.A. (2012) The latitudinal gradient in dispersal constraints:  
844 ecological specialisation drives diversification in tropical birds. *Ecology Letters*, **15**, 847-855.
- 845 Sánchez-González, L.A., Navarro-Sigüenza, A.G., Krabbe, N.K., Fjeldså, J. & García-Moreno, J. (2015) Diversification  
846 in the Andes: the *Atlapetes* brush-finches. *Zoologica Scripta*, **44**, 135-152.
- 847 Scheffers, B.R., Joppa, L.N., Pimm, S.L. & Laurance, W.F. (2012) What we know and don't know about Earth's  
848 missing biodiversity. *Trends in Ecology and Evolution*, **27**, 501-510.
- 849 Schluter, D. (2016) Speciation, ecological opportunity, and latitude. *American Naturalist*, **187**, 1-18.
- 850 Schluter, D. & Pennell, M.W. (2017) Speciation gradients and the distribution of biodiversity. *Nature*, **546**, 48-55.
- 851 Sedano, R.E. & Burns, K.J. (2010) Are the Northern Andes a species pump for Neotropical birds? Phylogenetics and  
852 biogeography of a clade of Neotropical tanagers (Aves: Thraupini). *Journal of Biogeography*, **37**, 325-343.
- 853 Seeholzer, G.F. & Brumfield, R.T. (2018) Isolation by distance, not incipient ecological speciation, explains genetic  
854 differentiation in an Andean songbird (Aves: Furnariidae: *Cranioleuca antisiensis*, Line-cheeked Spinetail)  
855 despite near threefold body size change across an environmental gradient. *Molecular Ecology*, **27**, 279-296.
- 856 Smith, B.T. & Klicka, J. (2010) The profound influence of the Late Pliocene Panamanian uplift on the exchange,  
857 diversification, and distribution of New World birds. *Ecography*, **33**, 333-342.
- 858 Smith, B.T., Seeholzer, G.F., Harvey, M.G., Cuervo, A.M. & Brumfield, R.T. (2017) A latitudinal phylogeographic  
859 diversity gradient in birds. *PLoS Biology*, **15**, e2001073.
- 860 Smith, B.T., Bryson, J., Robert W., Mauck, W.M., Chaves, J., Robbins, M.B., Aleixo, A. & Klicka, J. (2018) Species  
861 delimitation and biogeography of the gnatcatchers and gnatwrens (Aves: Polioptilidae). *Molecular*  
862 *Phylogenetics and Evolution*, **126**, 45-57.
- 863 Smith, B.T., McCormack, J.E., Cuervo, A.M., Hickerson, M.J., Aleixo, A., Cadena, C.D., Pérez-Emán, J., Burney,  
864 C.W., Xie, X., Harvey, M.G., Faircloth, B.C., Glenn, T.C., Derryberry, E.P., Prejean, J., Fields, S. &  
865 Brumfield, R.T. (2014) The drivers of tropical speciation. *Nature*, **515**, 406-409.
- 866 Socolar, J.B., Gilroy, J.J., Kunin, W.E. & Edwards, D.P. (2016) How should beta-diversity inform biodiversity  
867 conservation? *Trends in Ecology and Evolution*, **31**, 67-80.
- 868 Stamatakis, A. (2006) RAxML-VI-HPC: maximum likelihood-based phylogenetic analyses with thousands of taxa and  
869 mixed models. *Bioinformatics*, **22**, 2688-2690.
- 870 Stattersfield, A.J., Crosby, M.J., Long, A.J. & Wege, D.C. (1997) *Endemic bird areas of the world: priorities for*  
871 *biodiversity conservation*. BirdLife International (Conservation Series No. 7), Cambridge, UK.
- 872 Sukumaran, J. & Knowles, L.L. (2017) Multispecies coalescent delimits structure, not species. *Proceedings of the*  
873 *National Academy of Sciences of the USA*, **114**, 1607-1612.

- 874 Terborgh, J. (1971) Distribution on environmental gradients: theory and a preliminary interpretation of distributional  
875 patterns in the avifauna of the Cordillera Vilcabamba, Peru. *Ecology*, **52**, 23-40.
- 876 Terborgh, J. (1977) Bird species diversity on an Andean elevational gradient. *Ecology*, **58**, 1007-1019.
- 877 Tobias, J.A., Seddon, N., Spottiswoode, C.N., Pilgrim, J.D., Fishpool, L.D.C. & Collar, N.J. (2010) Quantitative  
878 criteria for species delimitation. *Ibis*, **152**, 724-746.
- 879 Tobias, J.A., Cornwallis, C.K., Derryberry, E.P., Claramunt, S., Brumfield, R.T. & Seddon, N. (2014) Species  
880 coexistence and the dynamics of phenotypic evolution in adaptive radiation. *Nature*, **506**, 359-363.
- 881 Toews, D.P.L. (2015) Biological species and taxonomic species: Will a new null hypothesis help? (A comment on Gill  
882 2014). *Auk*, **132**, 78-81.
- 883 Valderrama, E., Pérez-Emán, J.L., Brumfield, R.T., Cuervo, A.M. & Cadena, C.D. (2014) The influence of the  
884 complex topography and dynamic history of the montane Neotropics on the evolutionary differentiation of a  
885 cloud forest bird (*Premnoplex brunnescens*, Furnariidae). *Journal of Biogeography*, **41**, 1533-1546.
- 886 Velásquez-Tibatá, J., Salaman, P. & Graham, C.H. (2013) Effects of climate change on species distribution,  
887 community structure, and conservation of birds in protected areas in Colombia. *Regional Environmental*  
888 *Change*, **13**, 235-248.
- 889 Weir, J.T. (2006) Divergent timing and patterns of species accumulation in lowland and highland neotropical birds.  
890 *Evolution*, **60**, 842-855.
- 891 Weir, J.T. (2009) Implications of genetic differentiation in Neotropical montane forest birds. *Annals of the Missouri*  
892 *Botanical Garden*, **96**, 410-433.
- 893 Weir, J.T. & Schluter, D. (2007) The latitudinal gradient in recent speciation and extinction rates of birds and  
894 mammals. *Science*, **315**, 1574-1576.
- 895 Weir, J.T., Bermingham, E., Miller, M.J., Klicka, J. & González, M.A. (2008) Phylogeography of a morphologically  
896 diverse Neotropical montane species, the Common Bush-Tanager (*Chlorospingus ophthalmicus*). *Molecular*  
897 *Phylogenetics and Evolution*, **47**, 650-664.
- 898 Wilson, E.O. (1959) Adaptive shift and dispersal in a tropical ant fauna. *Evolution*, **13**, 122-144.
- 899 Winger, B.M. (2017) Consequences of divergence and introgression for speciation in Andean cloud forest birds.  
900 *Evolution*, **71**, 1815-1831.
- 901 Winger, B.M. & Bates, J.M. (2015) The tempo of trait divergence in geographic isolation: Avian speciation across the  
902 Marañón Valley of Peru. *Evolution*, **69**, 772-787.

903

904

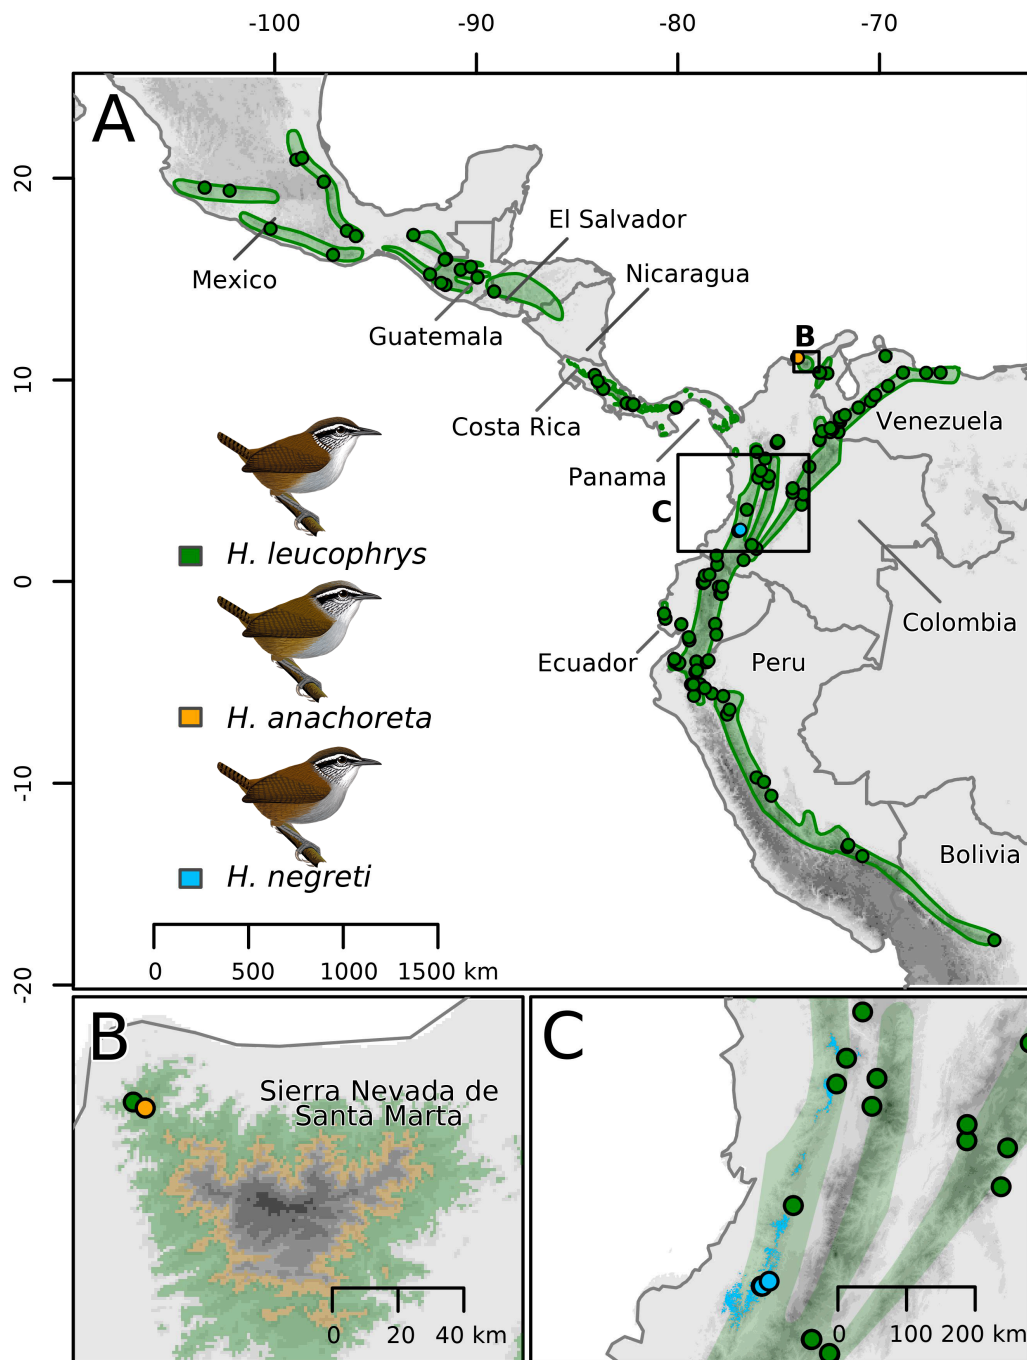

905  
906

907 **Figure 1.** Geographic distribution of wood-wrens in the *Henicorhina leucophrys* complex in the Neotropical montane  
908 region and localities where specimens were sampled for our phylogeographic analyses. The complex currently  
909 comprises three species: the widely distributed *H. leucophrys* ranging from Mexico to Bolivia and two narrow endemics  
910 from Colombia (*H. anachoreta* in the Sierra Nevada de Santa Marta and *H. negreti* on the western slope of the  
911 Cordillera Occidental). Distribution maps were obtained from BirdLife International (*H. leucophrys*) and Velásquez-  
912 Tibatá et al. (2013; *H. negreti*), or generated for this study based on information on elevational range (*H. anachoreta*;  
913 Cadena et al., 2016). Illustrations by F. Ayerbe.

914

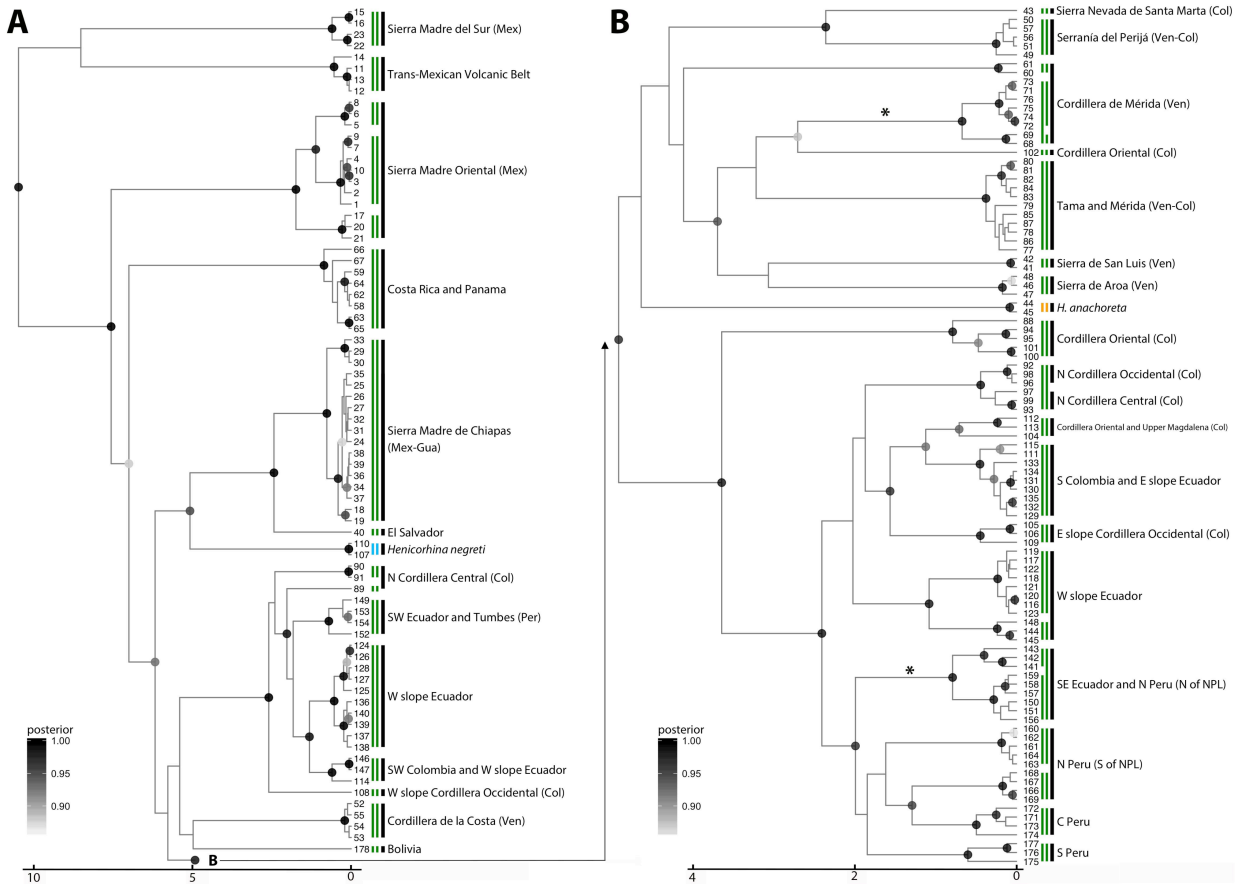

915

916

917 **Figure 2.** Phylogenetic relationships and divergence times among unique mtDNA haplotypes in the *H. leucophrys*  
 918 complex inferred using BEAST suggest (1) paraphyly of *H. leucophrys* with respect to *H. anachoreta* and *H. negreti*,  
 919 (2) a northern origin for the complex with subsequent colonization of South America, and (3) marked population  
 920 genetic structure partly attributable to geographic isolation mediated by physical barriers. Color shading on nodes  
 921 corresponds to posterior probabilities  $\geq 0.85$ . Black vertical lines indicate geographic regions; note that all deep  
 922 branches correspond to clades from mountain regions in Mexico and Central America and that South American  
 923 populations are also strongly structured. Green vertical lines signal presumptive species identified using multi-rate  
 924 Poisson Tree Processes (mPTP, left) and the Bayesian General Mixed Yule Coalescent Model (bGMYC, right); results  
 925 of these analyses were almost identical, with only minor discrepancies in two clades marked with asterisks. Haplotypes  
 926 are numbered at the tips of the tree; information on specimens having each haplotype is provided in Supplementary  
 927 Table 1.

928

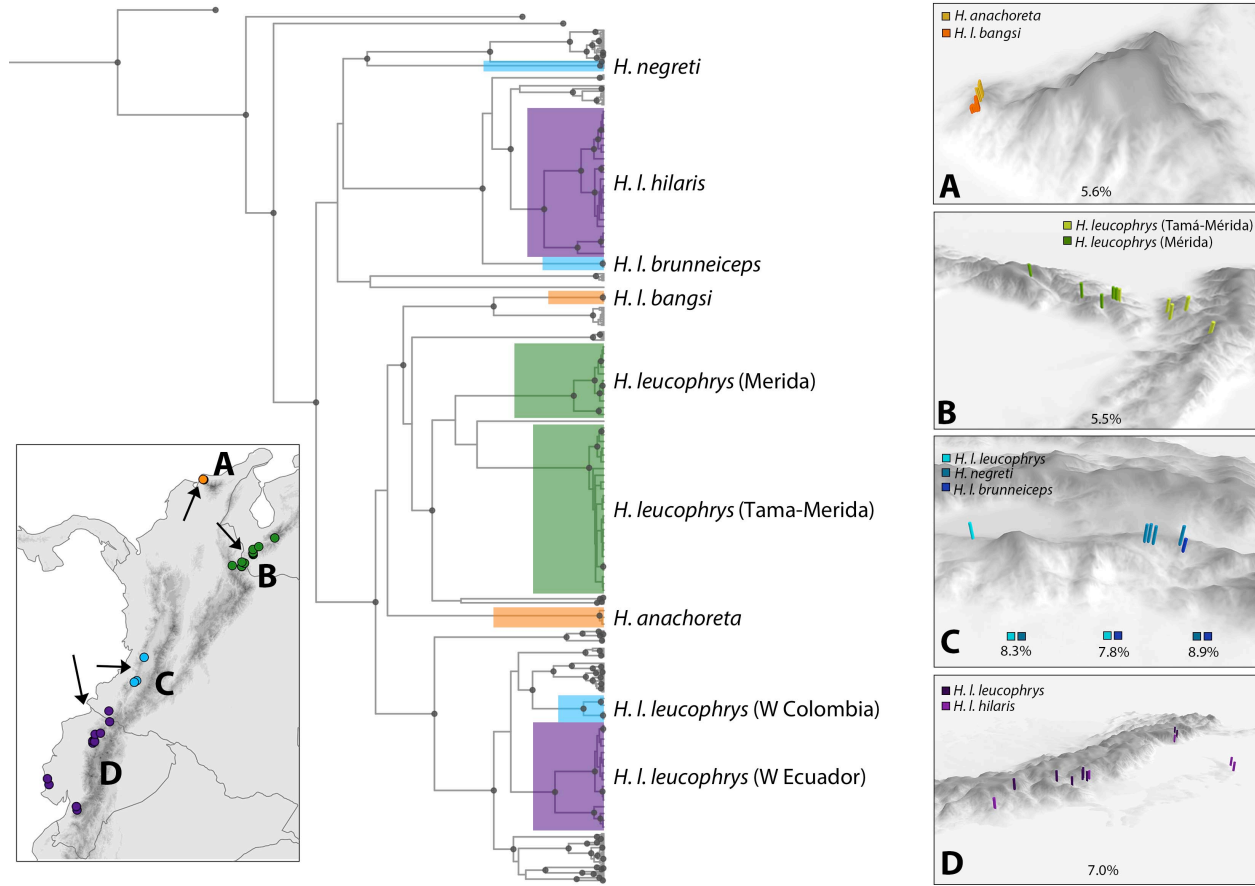

929

930

931 **Figure 3.** Elevational replacements involving distinct lineages of the *H. leucophrys* complex in montane South  
 932 America. Lineages replacing each other with elevation in a region share colors in the map, the phylogeny (modified  
 933 from Supplementary Figure 1, nodes indicated with grey dots have  $\geq 0.85$  posterior probability support), and the close-  
 934 up view of mountain slopes, where different shades are used for each lineage (arrows on the map show the direction  
 935 from which mountains are seen in panes A-D). In at least three regions (A,C, D), elevational replacements do not  
 936 involve sister taxa with the only possible exception being the novel case of cryptic replacement of lineages in the  
 937 Cordillera de Mérida, Venezuela (B), where affinities of lineages to each other and to those from other regions are not  
 938 strongly supported. Lineages involved in elevational replacements are deeply divergent from each other (panes show  
 939 mean uncorrected  $p$  distances in ATPase genes), occur in close proximity, and correspond to different presumptive  
 940 species identified by coalescent analyses (see text).

941

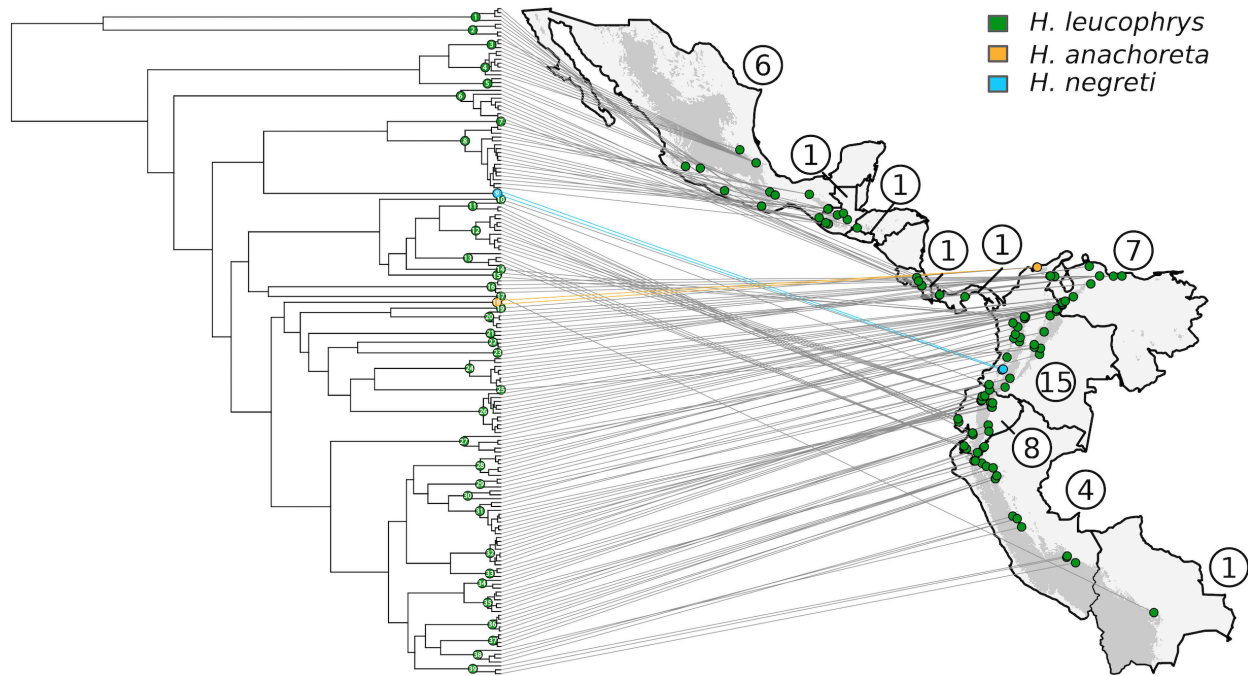

944 **Figure 4.** Geographic locations where we sampled 39 presumptive species in the *H. leucophrys* complex identified by  
945 coalescent analyses of mtDNA sequences. Dots and numbers on the tree (modified from Figure 2) correspond to  
946 species statistically inferred by the Bayesian General Mixed Yule Coalescent Model (bGMYC) with the threshold  
947 probability used to define group membership set at 0.50. Colors correspond to species epithets as per the current  
948 three-species taxonomy. Encircled numbers on the map indicate the number of presumptive species occurring in each  
949 country. Almost identical patterns were observed using the multi-rate Poisson Tree Processes (mPTP) method. For  
950 close-up views of geographic locations where each presumptive species was sampled, see Supplementary Figure 4.

951



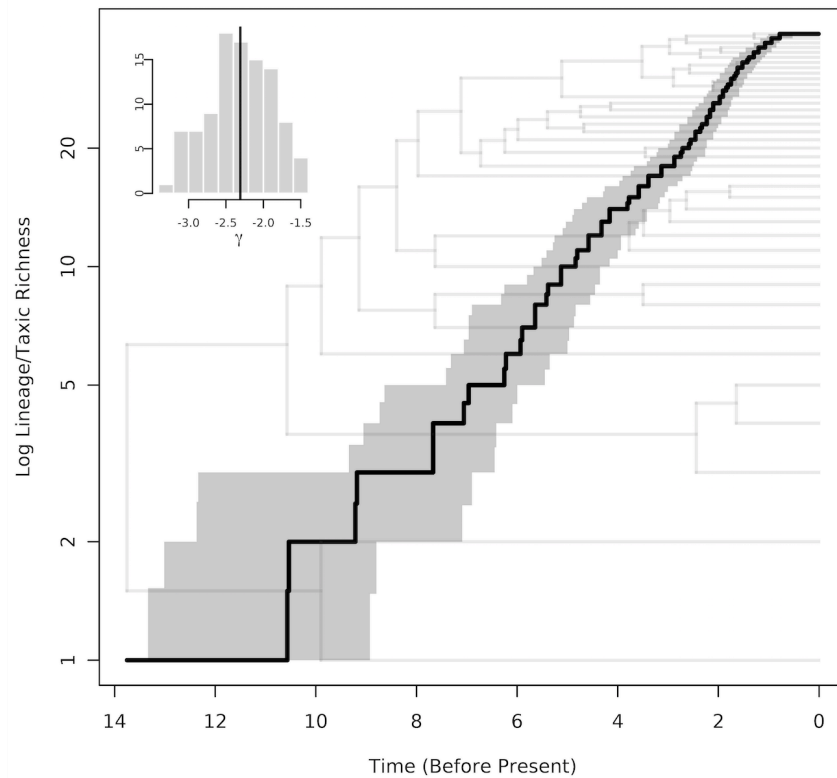

952

953

954 **Figure 5.** Lineage-through time plot showing accumulation of lineages over time in the *H. leucophrys* complex. Black  
955 lines are estimates based on the maximum clade credibility tree and grey indicates the 95% credibility interval across  
956 100 trees for the plot and for estimates of the gamma statistic. The shape of the curve and the associated gamma  
957 statistic suggests that rates of lineage accumulation have declined over time, but note that because this analyses used  
958 results of bGMYC as input no presumptive species younger than 1 million years were considered. The pattern may  
959 also reflect incomplete sampling of young lineages particularly within South America.

960

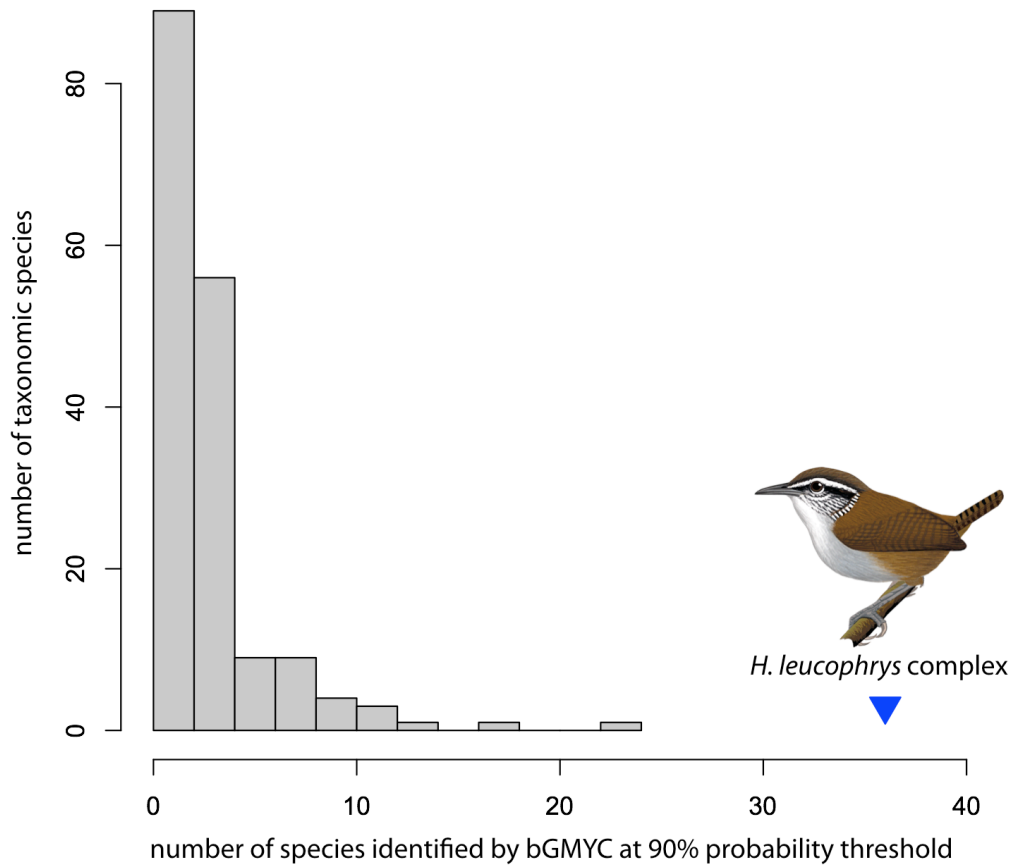

961

962

963 **Figure 6.** Relative to the frequency distribution of the number of presumptive species identified by coalescent analyses  
964 of mtDNA sequence data within 173 taxonomic species of New World birds (data from Harvey et al. 2017, Smith et  
965 al. 2017), our result for the *H. leucophrys* complex is a distant outlier. Even if many lineages cannot be shown to be  
966 reproductively isolated from others, the data reveal a remarkable and previously undocumented degree of population  
967 genetic structuring. Illustration by F. Ayerbe.

968

969

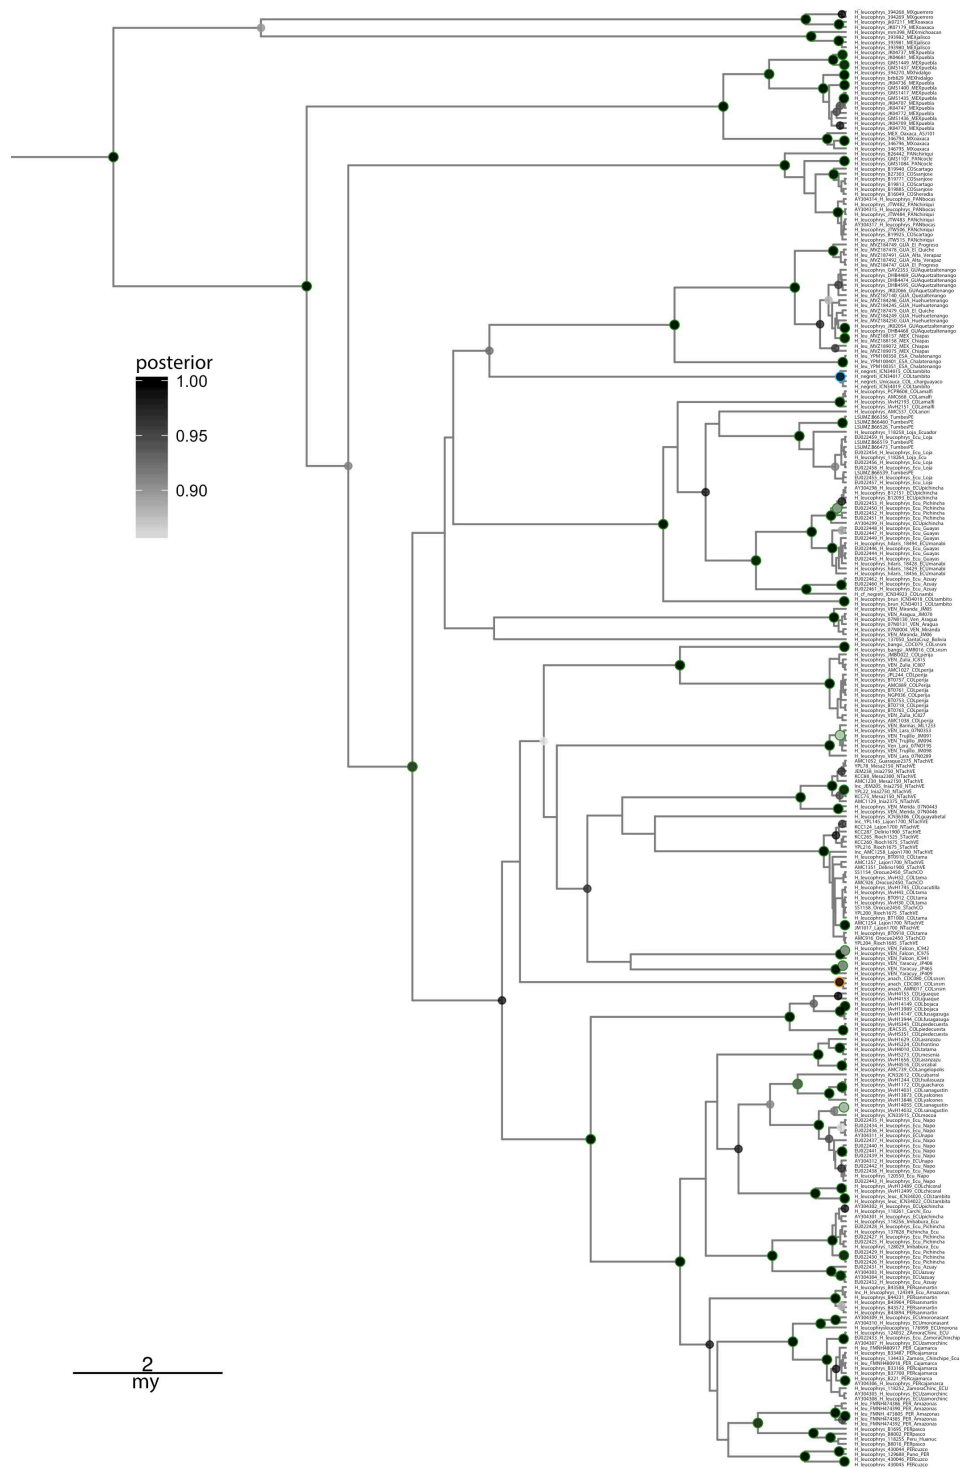

970

971 **Supplementary Figure 1.** Phylogenetic relationships among individuals in the *H. leucophrys* complex inferred using  
972 Bayesian analysis of sequences of the ATPase 6&8 mitochondrial genes. The phylogeny is the maximum clade  
973 credibility tree obtained in BEAST. Nodal support (i.e., posterior probabilities  $\geq 0.85$ ) is shown using a grey scale.  
974 Nodes with a colored outline (green = *H. leucophrys*, blue = *H. negreti*, orange = *H. anachoreta*) were also recovered  
975 with strong support ( $\geq 80\%$  bootstrap) in maximum-likelihood analysis (Supplementary Figure 2).

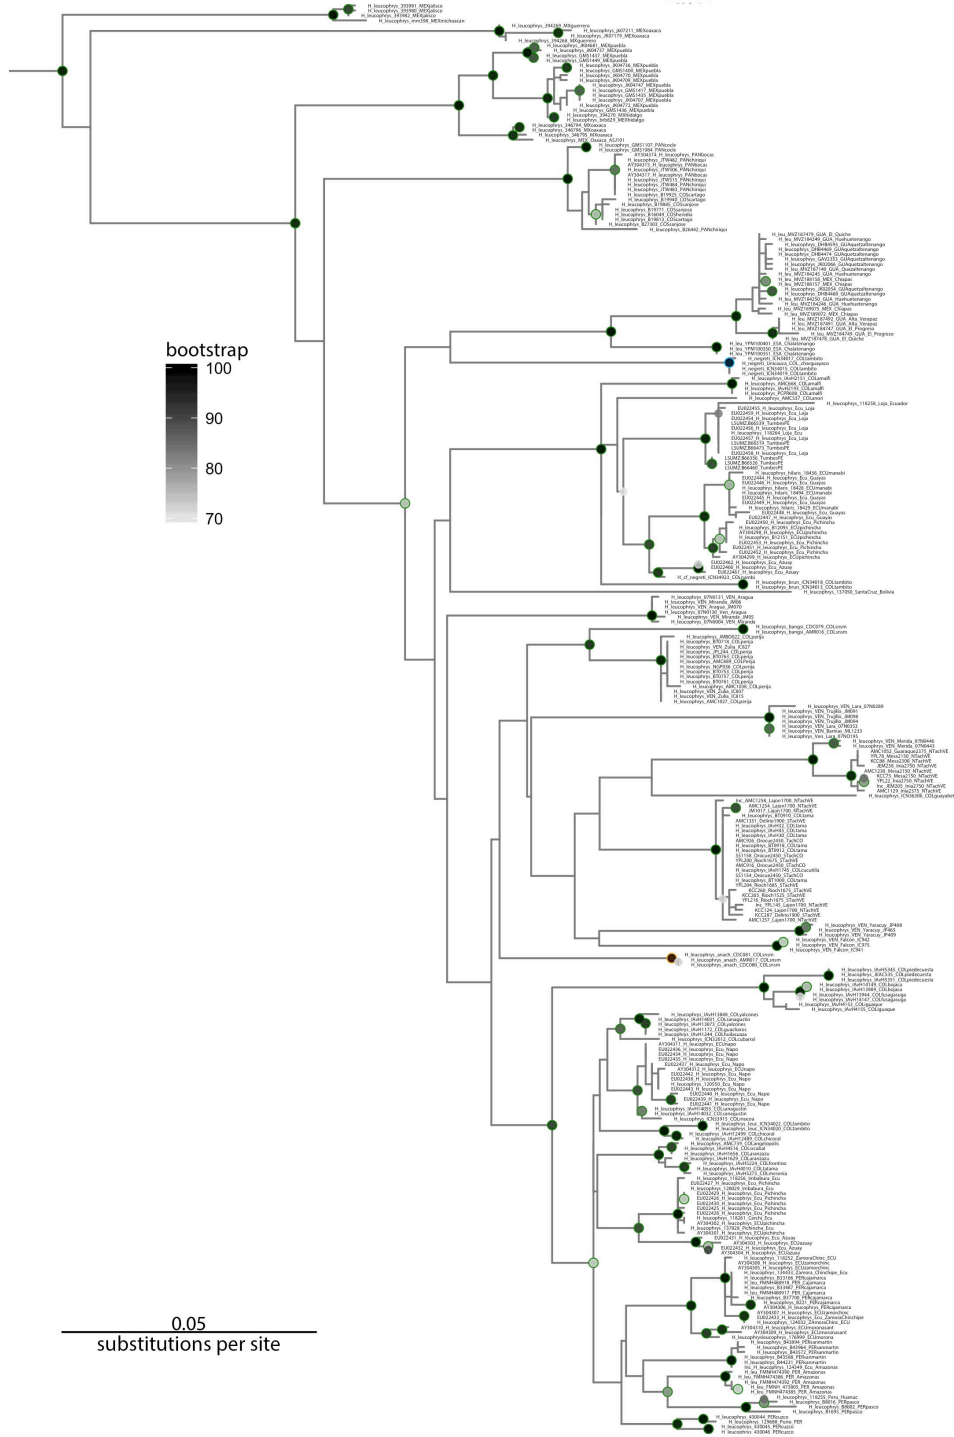

976

977

978 **Supplementary Figure 2.** Phylogenetic relationships among individuals in the *H. leucophrys* complex inferred using  
979 maximum-likelihood analysis of sequences of the ATPase 6&8 mitochondrial genes. The phylogeny is the maximum-  
980 likelihood tree obtained in RAxML. Nodal support (i.e., bootstrap values  $\geq 80\%$ ) is shown using a grey scale. Nodes  
981 with a colored outline (green = *H. leucophrys*, blue = *H. negreti*, orange = *H. anachoreta*) were also recovered with  
982 strong support ( $\geq 0.90$  posterior probability) in Bayesian analysis (Supplementary Figure 1).

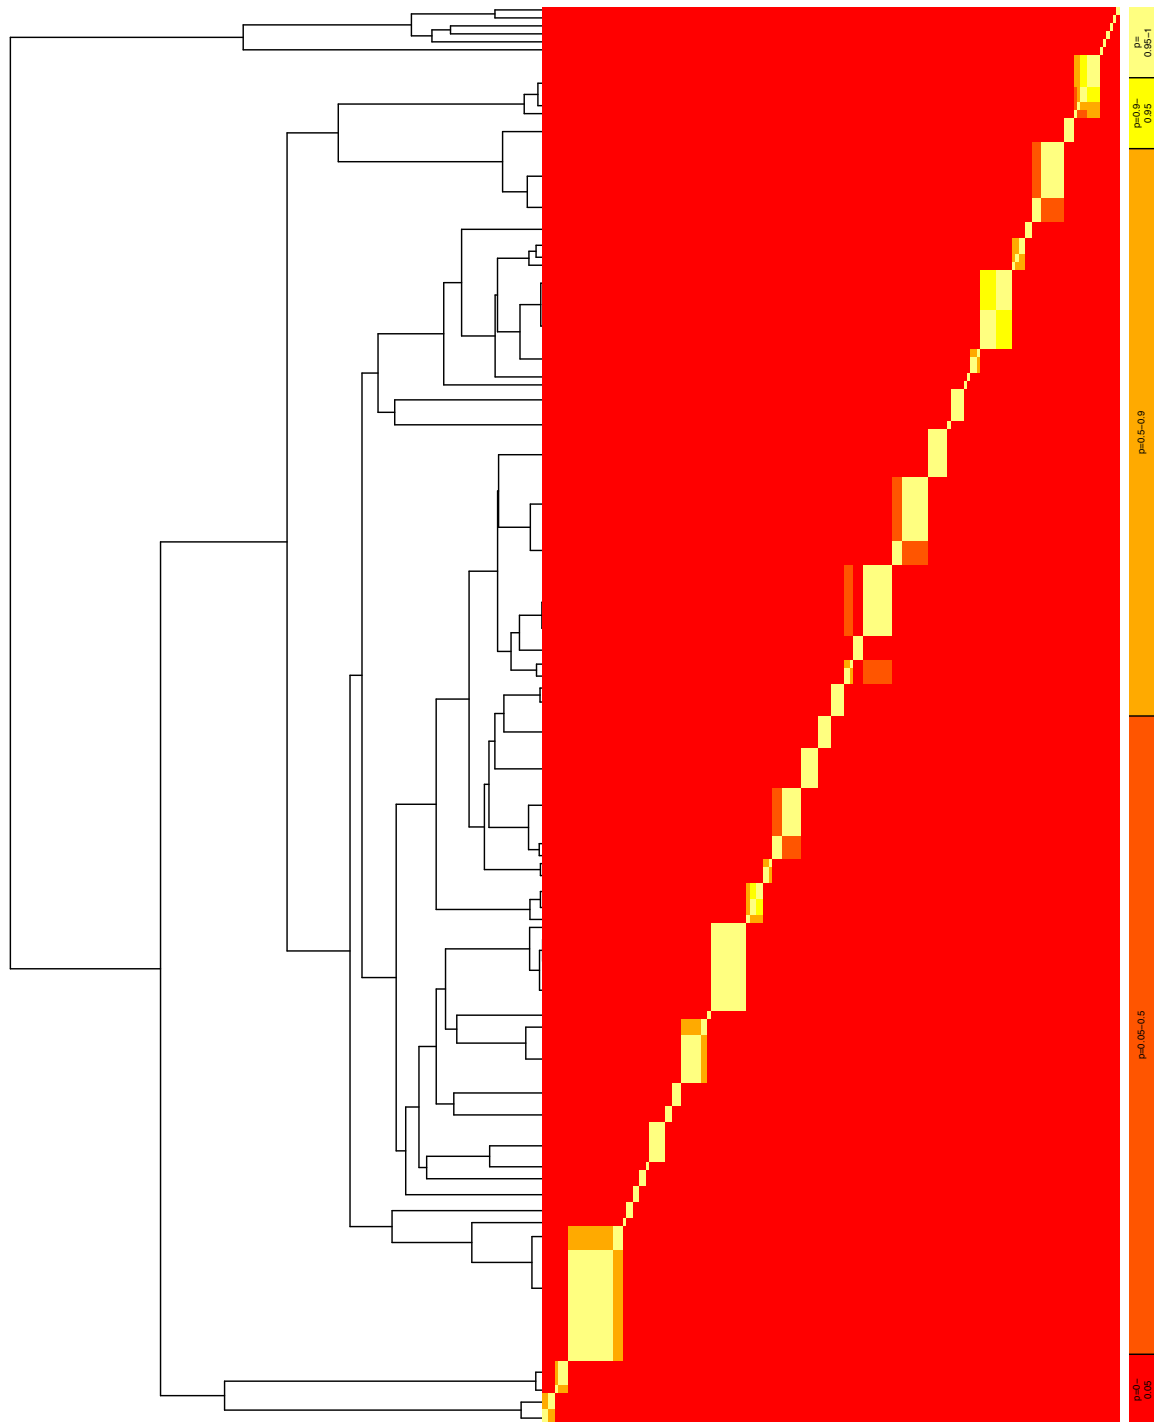

983

984 **Supplementary Figure 3.** Results of species delimitation analysis in the *H. leucophrys* complex employing the Bayesian  
985 General Mixed Yule Coalescent Model (bGMYC). The phylogeny showing relationships among haplotypes is the  
986 maximum clade credibility obtained using BEAST and the table to the right is a sequence-by-sequence matrix in  
987 which cells are color-coded to indicate the posterior probability that each pair of sequences is conspecific.

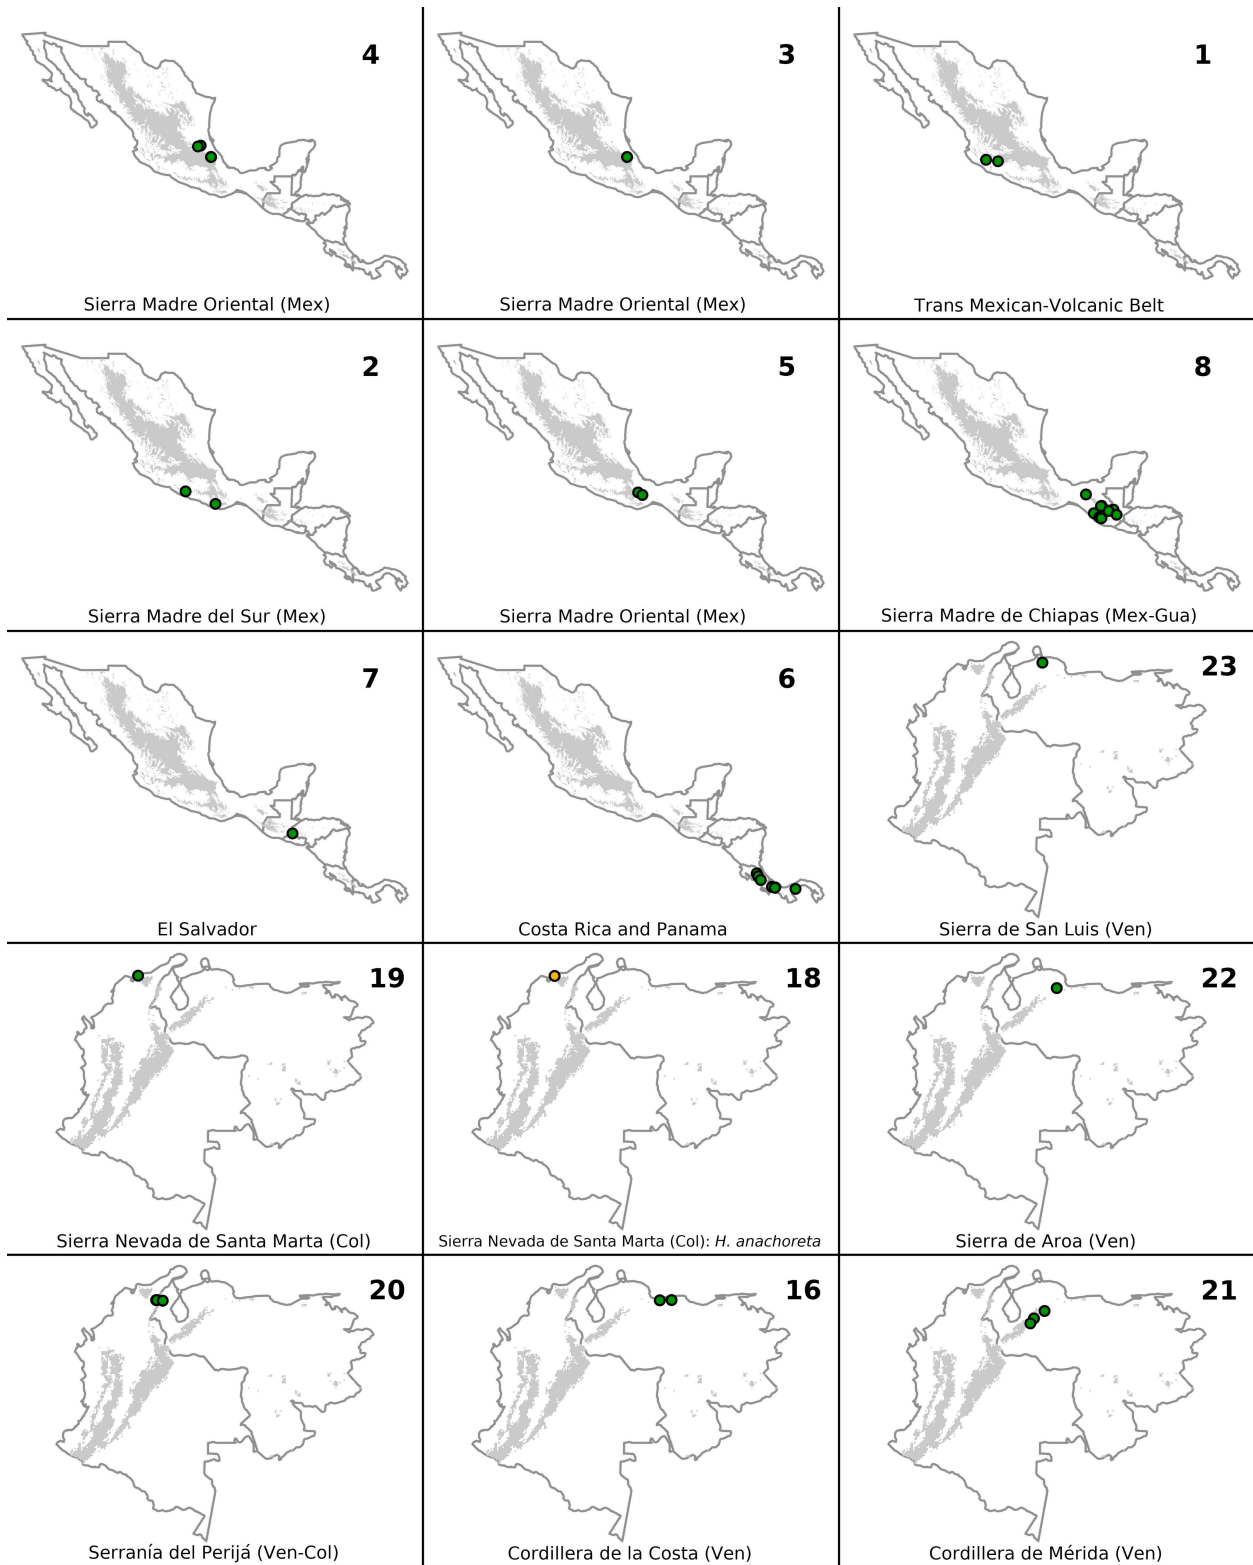

988

989

990

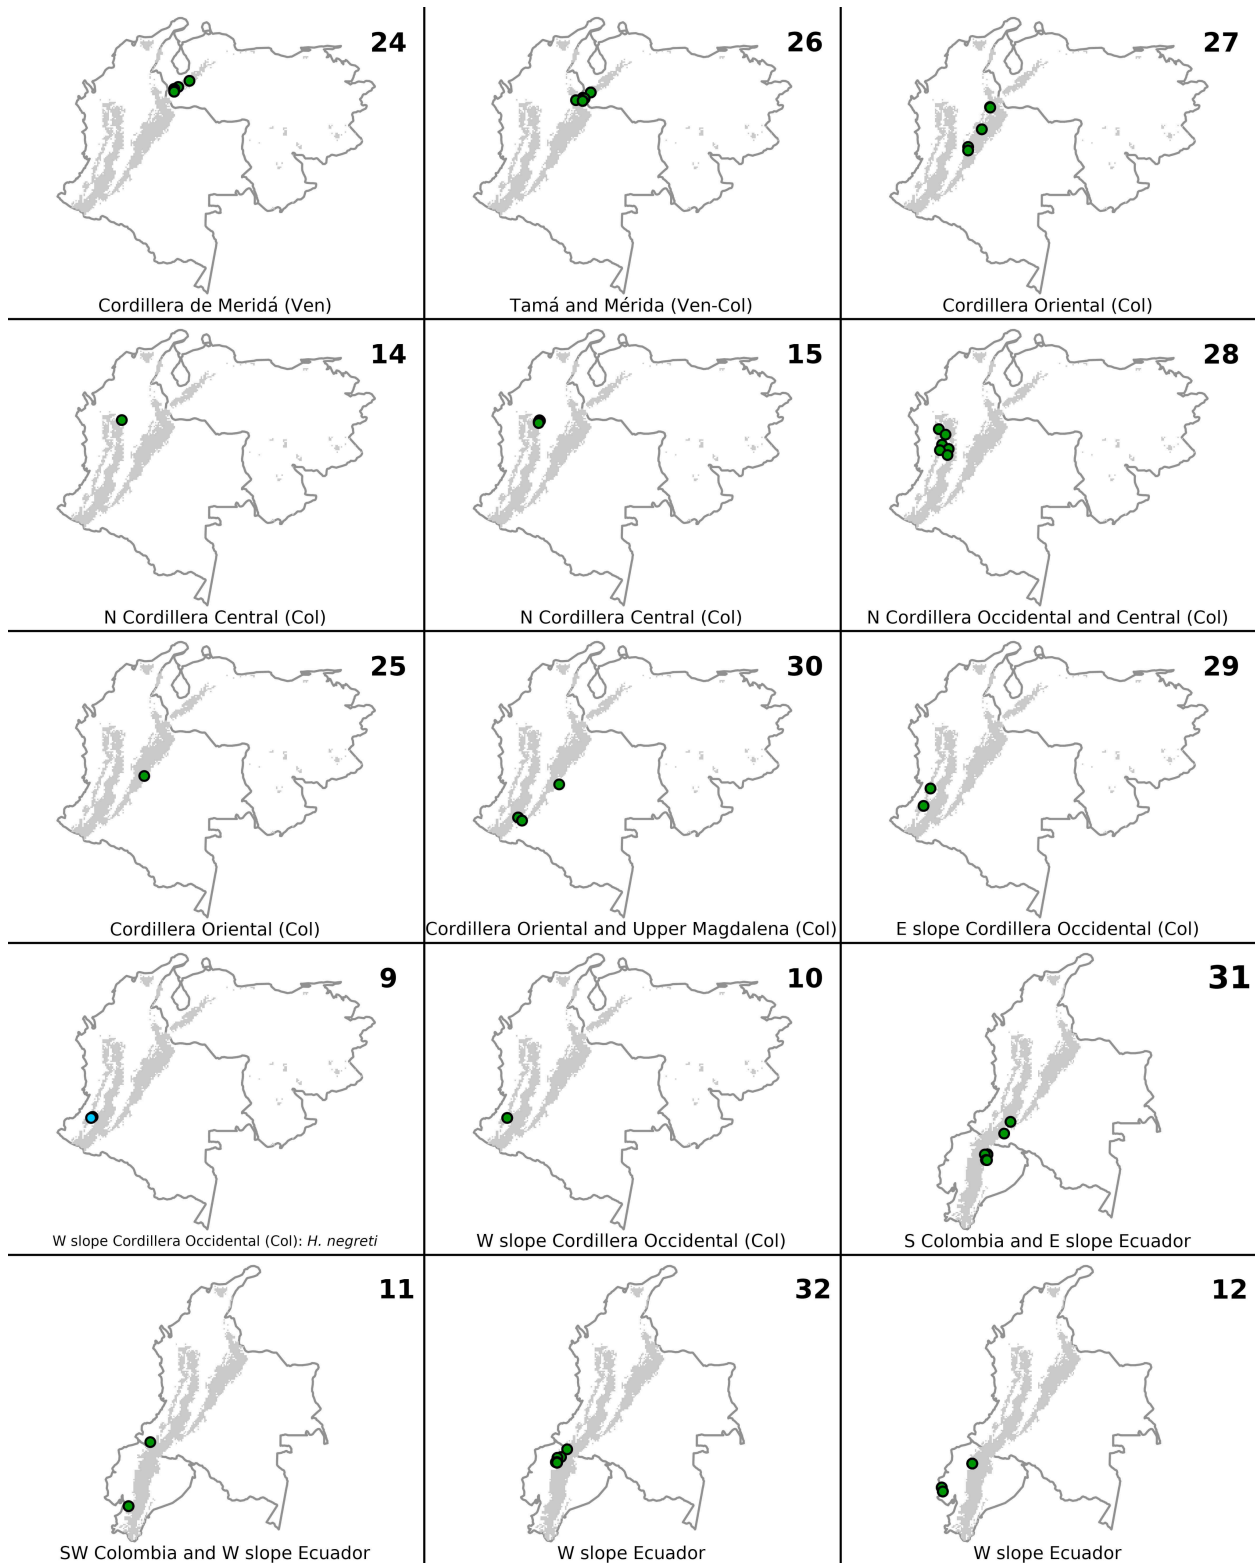

991

992

993

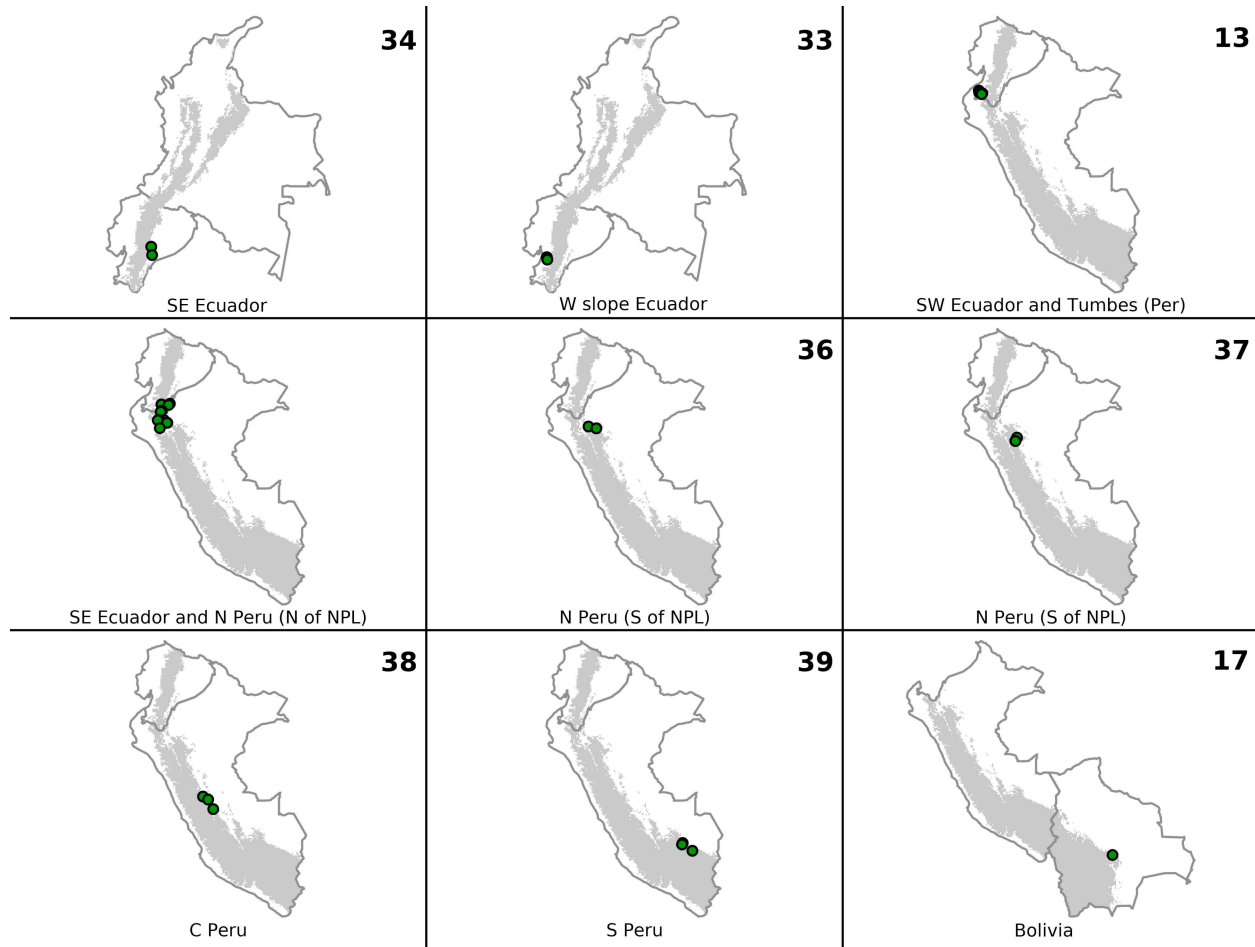

994

995

996 **Supplementary Figure 4.** Close-up views of geographic locations where presumptive species in the *H. leucophrys*  
997 complex identified by coalescent analyses of mtDNA sequences were sampled. Maps showing known locations of each  
998 presumptive species are ordered roughly from North to South, and are numbered according to numbers on nodes in  
999 the tree in Figure 4; points on maps are colored based on the current three-species taxonomy recognizing *H.*  
1000 *leucophrys*, *H. negreti*, and *H. anachoreta*. Some presumptive species have relatively large ranges (e.g. no. 6 across  
1001 Costa Rica and Panama) whereas others appear to be much more restricted, in some cases found at single localities so  
1002 far (e.g. no. 14 and 15 in the northern extreme of the Cordillera Central in Antioquia, Colombia).

1003



1004

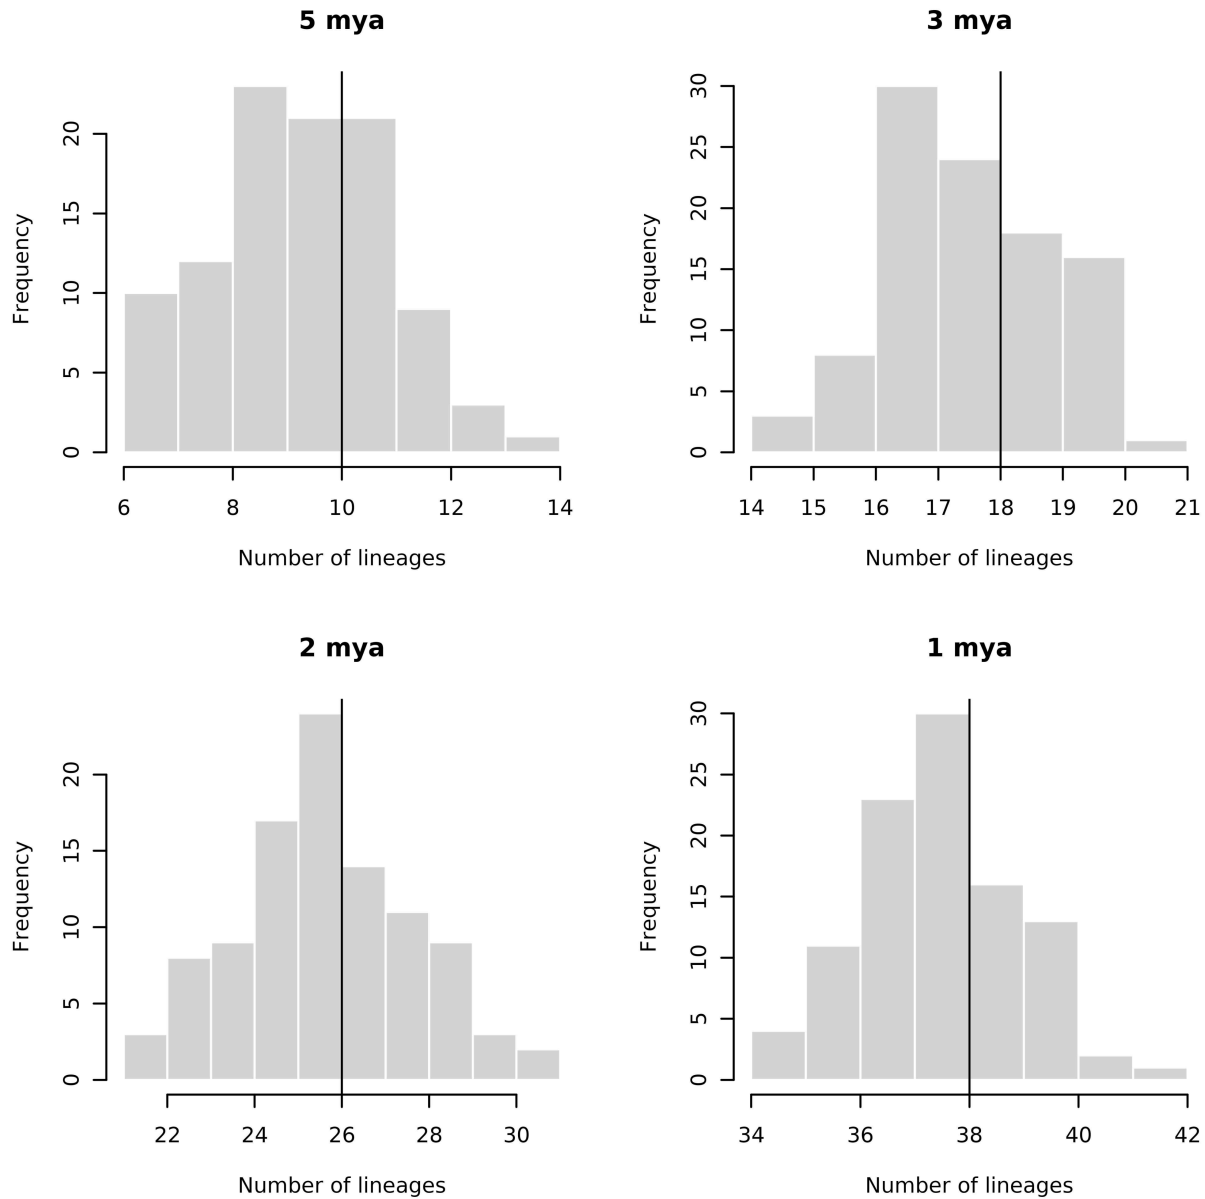

1005

1006 **Supplementary Figure 5.** Number of mtDNA lineages in the *H. leucophrys* complex of various ages (from 5 to 1 million  
1007 years ago [m.a.]). Vertical black lines correspond to the median number of lineages dating to at least each of the four  
1008 ages (i.e. splitting from their common ancestor with other lineages before each age) observed in a sample of 100 trees  
1009 in the posterior distribution obtained using BEAST; gray bars are the frequency distributions of number of lineages  
1010 per age across all trees.

1011

1012 **Supplementary Table 1.** (Provided as a separate .xlsx file). Information on specimens considered in phylogeographic  
1013 analyses including museum catalogue numbers, locality data, and GenBank accession numbers when available (those  
1014 for sequences generated for this study are pending). For each specimen, we also indicate the name used to refer to it in  
1015 Supplementary Figures 1 and 2, the ATPase 6/8 haplotype as shown in Figure 2, and the ID of the presumptive  
1016 species identified using bGMYC to which it belongs (Figure 3, Supplementary Figure 4).
